# Supplementary material for: In vitro and in vivo effects of 2,4 diaminoquinazoline inhibitors of the decapping scavenger enzyme DcpS: Context-specific modulation of SMN transcript levels
Source: PLoS One. 2017 Sep 25;12(9):e0185079. doi: 10.1371/journal.pone.0185079 (PMC5612656; doi:10.1371/journal.pone.0185079)
Supplement: S6 Table — (XLSX) [file pone.0185079.s011.xlsx]

## Sheet: Sheet1
Top 20 up-regulated genes 2B/- vehicle to 2B/+ vehicle
ENSEMBL	gene	desc	p-value	adjusted p-value	-Log10 adj P	log2(fold-change)	gene_type	chr	start	end	strand	length	2B- Veh1	2B- Veh2	2B- Veh3	2B- Veh4	2B- Veh5	2B- Veh6	2B+ Veh1	2B+ -Veh4	2B+ -Veh5	2B+-Veh6
ENSMUSG00000041681	Iapp	islet amyloid polypeptide [Source:MGI Symbol;Acc:MGI:96382]	1.55473e-09	2.59312e-07	6.58618	3	protein_coding	chr6	142298423	142303961	+	974	0.357	0.172	0.557	0.458	0.439	0.429	0	0	0	0.039
ENSMUSG00000028544	Slc5a9	solute carrier family 5 (sodium/glucose cotransporter), member 9 [Source:MGI Symbol;Acc:MGI:2140201]	1.01336e-10	2.18832e-08	7.65989	2.98272	protein_coding	chr4	111875375	111902918	-	5184	0.101	0.108	0.131	0.055	0.124	0.11	0	0.009	0	0.015
ENSMUSG00000030827	Fgf21	fibroblast growth factor 21 [Source:MGI Symbol;Acc:MGI:1861377]	1.18668e-07	1.17042e-05	4.93166	2.926	protein_coding	chr7	45613907	45615490	-	930	0.795	0.36	0.243	0.349	0.184	0.408	0.042	0	0	0
ENSMUSG00000028148	Them5	thioesterase superfamily member 5 [Source:MGI Symbol;Acc:MGI:1913448]	1.41455e-09	2.37864e-07	6.62367	2.75743	protein_coding	chr3	94342099	94347352	+	1540	0.226	0.326	0.264	0.369	0.361	0.271	0.077	0	0	0
ENSMUSG00000074037	Mc1r	melanocortin 1 receptor [Source:MGI Symbol;Acc:MGI:99456]	2.27887e-08	2.85067e-06	5.54505	2.73697	protein_coding	chr8	123407082	123410742	+	3661	0.095	0.076	0.062	0.122	0.082	0.093	0.011	0	0	0
ENSMUSG00000085091	E230015J15Rik	epidermal growth factor receptor, opposite strand [Source:MGI Symbol;Acc:MGI:2443051]	6.96755e-07	5.03307e-05	4.29817	2.66297	antisense	chr11	16815431	16830702	-	4063	0.064	0.069	0.022	0.05	0.074	0.056	0	0	0	0
ENSMUSG00000085511	Gm11738	predicted gene 11738 [Source:MGI Symbol;Acc:MGI:3650365]	7.57767e-07	5.36055e-05	4.27079	2.48543	antisense	chr11	118114855	118118279	+	2158	0.06	0.129	0.168	0.169	0.099	0.123	0	0.02	0	0
ENSMUSG00000042828	Trim72	tripartite motif-containing 72 [Source:MGI Symbol;Acc:MGI:3612190]	1.53509e-16	1.04974e-13	12.9789	2.35796	protein_coding	chr7	128003989	128011393	+	2553	0.511	0.721	0.62	0.604	0.485	0.684	0.062	0.138	0.128	0.09
ENSMUSG00000038508	Gdf15	growth differentiation factor 15 [Source:MGI Symbol;Acc:MGI:1346047]	8.40052e-08	8.61684e-06	5.06465	2.34104	protein_coding	chr8	70629393	70632456	-	1852	0.282	0.362	0.269	0.307	0.138	0.246	0.043	0.072	0	0.021
ENSMUSG00000031845	Bcmo1	beta-carotene oxygenase 1 [Source:MGI Symbol;Acc:MGI:1926923]	2.26121e-07	1.94095e-05	4.71198	2.25154	protein_coding	chr8	117095854	117133720	+	2543	0.171	0.241	0.356	0.287	0.168	0.359	0.109	0	0.064	0
ENSMUSG00000051297	2410124H12Rik	RIKEN cDNA 2410124H12 gene [Source:MGI Symbol;Acc:MGI:1924035]	0.000400372	0.00730101	2.13662	2.11548	protein_coding	chr16	92478743	92497365	+	704	0	0.159	0.128	0.23	0.304	0.324	0	0	0	0
ENSMUSG00000042357	Gjb5	gap junction protein, beta 5 [Source:MGI Symbol;Acc:MGI:95723]	1.86559e-10	3.82725e-08	7.41711	2.10093	protein_coding	chr4	127354809	127358181	-	1721	0.53	0.324	0.736	0.613	0.72	0.574	0.115	0.128	0.095	0.111
ENSMUSG00000039628	Hs3st6	heparan sulfate (glucosamine) 3-O-sulfotransferase 6 [Source:MGI Symbol;Acc:MGI:3580487]	0.000157917	0.00363191	2.43987	2.09311	protein_coding	chr17	24753003	24758683	+	1219	0.285	0.183	0.074	0.133	0.07	0.156	0.032	0	0	0
ENSMUSG00000005540	Fcer2a	Fc receptor, IgE, low affinity II, alpha polypeptide [Source:MGI Symbol;Acc:MGI:95497]	0.000273362	0.00549268	2.26022	2.05889	protein_coding	chr8	3681737	3694174	-	2241	0.019	0.125	0.081	0.054	0.038	0.051	0	0	0	0
ENSMUSG00000031142	Cacna1f	calcium channel, voltage-dependent, alpha 1F subunit [Source:MGI Symbol;Acc:MGI:1859639]	0.000305691	0.00597261	2.22384	2.04731	protein_coding	chrX	7607083	7635196	+	9089	0.019	0.012	0.035	0.022	0.005	0.021	0.004	0	0	0
ENSMUSG00000086949	Gm13066	predicted gene 13066 [Source:MGI Symbol;Acc:MGI:3701131]	0.000100181	0.00258519	2.58751	2.03953	antisense	chr4	149565620	149567790	-	884	0.246	0.316	0.307	0.321	0.048	0.258	0	0.05	0.046	0
ENSMUSG00000034634	Ly6d	lymphocyte antigen 6 complex, locus D [Source:MGI Symbol;Acc:MGI:96881]	9.77504e-16	5.72957e-13	12.2419	2.01668	protein_coding	chr15	74762056	74763567	-	691	2.516	2.504	2.682	2.934	2.721	2.309	0.742	0.319	0.653	0.664
ENSMUSG00000078612	1700024P16Rik	RIKEN cDNA 1700024P16 gene [Source:MGI Symbol;Acc:MGI:2685466]	7.19817e-07	5.18142e-05	4.28555	2.01594	protein_coding	chr4	104913456	105016863	+	3136	0.166	0.16	0.159	0.246	0.136	0.279	0	0.042	0.039	0.073
ENSMUSG00000060678	Hist1h4c	histone cluster 1, H4c [Source:MGI Symbol;Acc:MGI:2448421]	4.28034e-05	0.00137635	2.86127	1.94753	protein_coding	chr13	23698060	23698454	-	395	0.66	1.272	2.518	1.437	1.515	0.769	0.699	0.224	0	0.193
ENSMUSG00000040026	Saa3	serum amyloid A 3 [Source:MGI Symbol;Acc:MGI:98223]	0.0087077	0.0622293	1.20601	1.9386	protein_coding	chr7	46711998	46715676	-	531	0.082	0.42	0.341	0.535	0.08	1.717	0	0.249	0	0.072
Top 20 down-regulated genes 2B/- vehicle to 2B/+ vehicle
ENSEMBL	gene	desc	p-value	adjusted p-value	-Log10 adj P	log2(fold-change)	gene_type	chr	start	end	strand	length	2B- Veh1	2B- Veh2	2B- Veh3	2B- Veh4	2B- Veh5	2B- Veh6	2B+ Veh1	2B+ -Veh4	2B+ -Veh5	2B+-Veh6
ENSMUSG00000029368	Alb	albumin [Source:MGI Symbol;Acc:MGI:87991]	0.00109831	0.0149913	1.82416	-2.38113	protein_coding	chr5	90460889	90476603	+	2043	0.277	0.301	0.31	0.179	0.23	0.149	0.135	0.173	4.737	0.168
ENSMUSG00000022860	Chodl	chondrolectin [Source:MGI Symbol;Acc:MGI:2179069]	3.81866e-79	7.83399e-75	74.106	-2.50565	protein_coding	chr16	78930948	78951733	+	3820	1.286	1.403	1.231	1.253	1.13	0.975	8.136	7.719	5.636	6.092
ENSMUSG00000044429	Cryga	crystallin, gamma A [Source:MGI Symbol;Acc:MGI:88521]	0.00233287	0.0253687	1.5957	-2.5325	protein_coding	chr1	65100389	65103373	-	730	0.119	0.229	0.248	0.167	0.059	0.052	0.108	0	0.056	4.293
ENSMUSG00000025432	Avil	advillin [Source:MGI Symbol;Acc:MGI:1333798]	4.10479e-05	0.00133455	2.87467	-2.56139	protein_coding	chr10	127000709	127020994	+	3398	0.256	0.361	0.106	0.263	0.151	0.157	3.424	0.065	1.508	0.259
ENSMUSG00000051367	Six1	sine oculis-related homeobox 1 [Source:MGI Symbol;Acc:MGI:102780]	1.06954e-08	1.44675e-06	5.83961	-2.60602	protein_coding	chr12	73040015	73053887	-	4383	0.02	0.025	0.031	0	0.019	0.009	0.297	0.07	0.112	0.148
ENSMUSG00000022868	Ahsg	alpha-2-HS-glycoprotein [Source:MGI Symbol;Acc:MGI:107189]	0.000401912	0.00732258	2.13534	-2.66131	protein_coding	chr16	22892042	22899438	+	1474	0.118	0.038	0.092	0.055	0.203	0	0.187	0.06	2.253	0.181
ENSMUSG00000024041	Cryaa	crystallin, alpha A [Source:MGI Symbol;Acc:MGI:88515]	6.67418e-05	0.00188083	2.72565	-2.7318	protein_coding	chr17	31677933	31681722	+	1186	0.257	0.047	0.191	0.034	0.072	0.192	0.233	0.335	0.207	3.512
ENSMUSG00000079466	Prdm12	PR domain containing 12 [Source:MGI Symbol;Acc:MGI:2685844]	2.58737e-05	0.000907349	3.04223	-3.04439	protein_coding	chr2	31640037	31655795	+	2471	0	0.068	0.037	0.016	0	0.015	0.782	0	0.398	0.093
ENSMUSG00000037798	Mat1a	methionine adenosyltransferase I, alpha [Source:MGI Symbol;Acc:MGI:88017]	0.00010793	0.00274373	2.56166	-3.05889	protein_coding	chr14	41105381	41124412	+	3208	0.014	0.017	0.014	0	0	0	0.012	0.041	0.537	0.012
ENSMUSG00000068327	Tlx2	T cell leukemia, homeobox 2 [Source:MGI Symbol;Acc:MGI:1350935]	3.08703e-05	0.00105551	2.97654	-3.14568	protein_coding	chr6	83068317	83070293	-	1589	0.055	0.035	0	0.026	0	0	0.869	0	0.542	0.048
ENSMUSG00000034115	Scn11a	sodium channel, voltage-gated, type XI, alpha [Source:MGI Symbol;Acc:MGI:1345149]	3.02568e-05	0.00103973	2.98308	-3.34903	protein_coding	chr9	119753763	119825456	-	5837	0.015	0.115	0.008	0.007	0.015	0.007	0.973	0	0.288	0.144
ENSMUSG00000025952	Crygc	crystallin, gamma C [Source:MGI Symbol;Acc:MGI:88523]	2.28542e-06	0.000130965	3.88285	-3.58496	protein_coding	chr1	65071525	65073689	-	786	0	0	0	0	0	0	0	0	0	2.334
ENSMUSG00000051207	Mrgprd	MAS-related GPR, member D [Source:MGI Symbol;Acc:MGI:3033142]	2.8927e-06	0.00015825	3.80066	-3.65105	protein_coding	chr7	145314835	145324059	+	3117	0	0	0	0	0	0.024	0.607	0	0.21	0.037
ENSMUSG00000067299	Crygd	crystallin, gamma D [Source:MGI Symbol;Acc:MGI:88524]	1.30174e-06	8.42436e-05	4.07446	-3.88613	protein_coding	chr1	65061872	65063452	-	1028	0	0	0.044	0	0	0	0	0	0.04	2.639
ENSMUSG00000052468	Pmp2	peripheral myelin protein 2 [Source:MGI Symbol;Acc:MGI:102667]	2.83433e-22	4.15331e-19	18.3816	-4.00608	protein_coding	chr3	10179851	10183885	-	1364	0.605	5.934	5.734	4.727	2.412	1.699	65	85.47	41.366	31.63
ENSMUSG00000041737	Tmem45b	transmembrane protein 45b [Source:MGI Symbol;Acc:MGI:2384574]	3.46815e-07	2.81222e-05	4.55095	-4.13955	protein_coding	chr9	31426199	31464238	-	1572	0	0	0	0.026	0.027	0	1.957	0	0.365	0.097
ENSMUSG00000070870	Cryge	crystallin, gamma E [Source:MGI Symbol;Acc:MGI:88525]	1.27883e-07	1.23751e-05	4.90745	-4.20945	protein_coding	chr1	65048554	65051149	-	723	0	0	0	0	0	0	0	0	0	4.07
ENSMUSG00000079278	Tmem233	transmembrane protein 233 [Source:MGI Symbol;Acc:MGI:3651514]	7.05971e-08	7.31464e-06	5.13581	-4.34651	protein_coding	chr5	116038755	116083244	-	2477	0	0.09	0	0.033	0.035	0.015	2.675	0.036	0.844	0.108
ENSMUSG00000034533	Scn10a	sodium channel, voltage-gated, type X, alpha [Source:MGI Symbol;Acc:MGI:108029]	7.11395e-08	7.33381e-06	5.13467	-4.38143	protein_coding	chr9	119608456	119719032	-	6416	0.007	0.043	0.028	0	0.013	0	1.125	0.007	0.486	0.107
ENSMUSG00000073658	Crygb	crystallin, gamma B [Source:MGI Symbol;Acc:MGI:88522]	4.02164e-09	6.02219e-07	6.22025	-4.94251	protein_coding	chr1	65080228	65082267	-	604	0	0	0	0	0	0	0	0	0	8.288
