# Supplementary material for: In vitro and in vivo effects of 2,4 diaminoquinazoline inhibitors of the decapping scavenger enzyme DcpS: Context-specific modulation of SMN transcript levels
Source: PLoS One. 2017 Sep 25;12(9):e0185079. doi: 10.1371/journal.pone.0185079 (PMC5612656; doi:10.1371/journal.pone.0185079)
Supplement: S11 Table — (XLSX) [file pone.0185079.s016.xlsx]

## Sheet: 2B-Veh_vs_2B-859_0.05 (2)
		2B-Veh vs 2B-RG3039	WT-Veh vs 2B-Veh
gene	desc	log2(fold-change)	log2(fold-change)			Magnitude of difference in Log2 fold change	Magnitude of difference in Log2 fold change
Scn10a	sodium channel, voltage-gated, type X, alpha [Source:MGI Symbol;Acc:MGI:108029]	1.70044	-4.38143	opposite	FALSE	6.08187	6.08187
Mrgprd	MAS-related GPR, member D [Source:MGI Symbol;Acc:MGI:3033142]	1.80735	-3.65105	opposite	FALSE	5.45841	5.45841
Pmp2	peripheral myelin protein 2 [Source:MGI Symbol;Acc:MGI:102667]	1.42924	-4.00608	opposite	FALSE	5.43533	5.43533
Map3k6	mitogen-activated protein kinase kinase kinase 6 [Source:MGI Symbol;Acc:MGI:1855691]	-2.94155	1.77879	FALSE	opposite	-4.72033	4.72033
Etnppl	ethanolamine phosphate phospholyase [Source:MGI Symbol;Acc:MGI:1919010]	-2.76407	1.2596	FALSE	opposite	-4.02367	4.02367
Ada	adenosine deaminase [Source:MGI Symbol;Acc:MGI:87916]	-2.09741	1.88514	FALSE	opposite	-3.98255	3.98255
Iapp	islet amyloid polypeptide [Source:MGI Symbol;Acc:MGI:96382]	-0.934905	3	FALSE	opposite	-3.9349	3.9349
Fgf21	fibroblast growth factor 21 [Source:MGI Symbol;Acc:MGI:1861377]	-1	2.926	FALSE	opposite	-3.926	3.926
Sds	serine dehydratase [Source:MGI Symbol;Acc:MGI:98270]	-2.35588	1.42939	FALSE	opposite	-3.78527	3.78527
E230015J15Rik	epidermal growth factor receptor, opposite strand [Source:MGI Symbol;Acc:MGI:2443051]	-1.03562	2.66297	FALSE	opposite	-3.69859	3.69859
Reg3b	regenerating islet-derived 3 beta [Source:MGI Symbol;Acc:MGI:97478]	1.9386	-1.58496	opposite	FALSE	3.52356	3.52356
Gm13066	predicted gene 13066 [Source:MGI Symbol;Acc:MGI:3701131]	-1.41504	2.03953	FALSE	opposite	-3.45457	3.45457
Gp2	glycoprotein 2 (zymogen granule membrane) [Source:MGI Symbol;Acc:MGI:1914383]	1.53605	-1.76783	opposite	FALSE	3.30388	3.30388
8430408G22Rik	RIKEN cDNA 8430408G22 gene [Source:MGI Symbol;Acc:MGI:1918730]	-1.91981	1.36968	FALSE	opposite	-3.28949	3.28949
Tmem82	transmembrane protein 82 [Source:MGI Symbol;Acc:MGI:2384869]	-2.07529	1.11765	FALSE	opposite	-3.19294	3.19294
Galnt15	UDP-N-acetyl-alpha-D-galactosamine:polypeptide N-acetylgalactosaminyltransferase 15 [Source:MGI Symbol;Acc:MGI:1926004]	-1.56754	1.61742	FALSE	opposite	-3.18496	3.18496
Tmem52	transmembrane protein 52 [Source:MGI Symbol;Acc:MGI:1916921]	-2.20862	0.945234	FALSE	opposite	-3.15385	3.15385
Trim63	tripartite motif-containing 63 [Source:MGI Symbol;Acc:MGI:2447992]	-1.54432	1.60768	FALSE	opposite	-3.152	3.152
Slc25a34	solute carrier family 25, member 34 [Source:MGI Symbol;Acc:MGI:2686215]	-1.80876	1.24778	FALSE	opposite	-3.05653	3.05653
Pdk4	pyruvate dehydrogenase kinase, isoenzyme 4 [Source:MGI Symbol;Acc:MGI:1351481]	-1.79884	1.24687	FALSE	opposite	-3.04572	3.04572
Pirt	phosphoinositide-interacting regulator of transient receptor potential channels [Source:MGI Symbol;Acc:MGI:2443635]	0.772931	-2.25695	opposite	FALSE	3.02988	3.02988
Gm807	predicted gene 807 [Source:MGI Symbol;Acc:MGI:2685653]	-1.6695	1.35781	FALSE	opposite	-3.02731	3.02731
Hif3a	hypoxia inducible factor 3, alpha subunit [Source:MGI Symbol;Acc:MGI:1859778]	-1.3266	1.65846	FALSE	opposite	-2.98506	2.98506
Matn1	matrilin 1, cartilage matrix protein [Source:MGI Symbol;Acc:MGI:106591]	-1.5615	1.41504	FALSE	opposite	-2.97654	2.97654
C330021F23Rik	RIKEN cDNA C330021F23 gene [Source:MGI Symbol;Acc:MGI:3612471]	1.36923	-1.58496	opposite	FALSE	2.9542	2.9542
1700024P16Rik	RIKEN cDNA 1700024P16 gene [Source:MGI Symbol;Acc:MGI:2685466]	-0.91427	2.01594	FALSE	opposite	-2.93021	2.93021
6330444E15Rik		-1.49304	1.4361	FALSE	opposite	-2.92914	2.92914
Angptl4	angiopoietin-like 4 [Source:MGI Symbol;Acc:MGI:1888999]	-1.6266	1.27302	FALSE	opposite	-2.89962	2.89962
Chodl	chondrolectin [Source:MGI Symbol;Acc:MGI:2179069]	0.389191	-2.50565	opposite	FALSE	2.89484	2.89484
Gm10309	predicted gene 10309 [Source:MGI Symbol;Acc:MGI:3641941]	-1.70402	1.14684	FALSE	opposite	-2.85086	2.85086
Wnt7a	wingless-type MMTV integration site family, member 7A [Source:MGI Symbol;Acc:MGI:98961]	1.47995	-1.32899	opposite	FALSE	2.80895	2.80895
Pilrb2	paired immunoglobin-like type 2 receptor beta 2 [Source:MGI Symbol;Acc:MGI:2450535]	-1.58496	1.17585	FALSE	opposite	-2.76081	2.76081
Fam107a	family with sequence similarity 107, member A [Source:MGI Symbol;Acc:MGI:3041256]	-1.65691	1.09955	FALSE	opposite	-2.75646	2.75646
Gkn3	gastrokine 3 [Source:MGI Symbol;Acc:MGI:1916138]	1.30179	-1.43976	opposite	FALSE	2.74156	2.74156
Sgk1	serum/glucocorticoid regulated kinase 1 [Source:MGI Symbol;Acc:MGI:1340062]	-1.81158	0.92709	FALSE	opposite	-2.73867	2.73867
Otoa	otoancorin [Source:MGI Symbol;Acc:MGI:2149209]	-1.04924	1.676	FALSE	opposite	-2.72524	2.72524
Serpinb5	serine (or cysteine) peptidase inhibitor, clade B, member 5 [Source:MGI Symbol;Acc:MGI:109579]	-1.29278	1.41504	FALSE	opposite	-2.70782	2.70782
Alox12	arachidonate 12-lipoxygenase [Source:MGI Symbol;Acc:MGI:87998]	1.23563	-1.42742	opposite	FALSE	2.66305	2.66305
Hsf3	heat shock transcription factor 3 [Source:MGI Symbol;Acc:MGI:3045337]	-1.08746	1.52546	FALSE	opposite	-2.61292	2.61292
Zbtb16	zinc finger and BTB domain containing 16 [Source:MGI Symbol;Acc:MGI:103222]	-1.13551	1.45457	FALSE	opposite	-2.59008	2.59008
Fam83d	family with sequence similarity 83, member D [Source:MGI Symbol;Acc:MGI:1919128]	-1.4639	1.06565	FALSE	opposite	-2.52955	2.52955
Gm11681	predicted gene 11681 [Source:MGI Symbol;Acc:MGI:3650778]	-1.05063	1.45811	FALSE	opposite	-2.50873	2.50873
Arrdc2	arrestin domain containing 2 [Source:MGI Symbol;Acc:MGI:1918057]	-1.41842	1.04022	FALSE	opposite	-2.45864	2.45864
A230028O05Rik	RIKEN cDNA A230028O05 gene [Source:MGI Symbol;Acc:MGI:2442126]	-1.12338	1.3155	FALSE	opposite	-2.43888	2.43888
Ccdc150	coiled-coil domain containing 150 [Source:MGI Symbol;Acc:MGI:1925266]	-0.941897	1.48113	FALSE	opposite	-2.42302	2.42302
Fgfr4	fibroblast growth factor receptor 4 [Source:MGI Symbol;Acc:MGI:95525]	1.08746	-1.32971	opposite	FALSE	2.41717	2.41717
Il12rb1	interleukin 12 receptor, beta 1 [Source:MGI Symbol;Acc:MGI:104579]	-1.30027	1.08511	FALSE	opposite	-2.38538	2.38538
Sult1a1	sulfotransferase family 1A, phenol-preferring, member 1 [Source:MGI Symbol;Acc:MGI:102896]	-1.63698	0.744345	FALSE	opposite	-2.38133	2.38133
Fkbp5	FK506 binding protein 5 [Source:MGI Symbol;Acc:MGI:104670]	-1.58307	0.781846	FALSE	opposite	-2.36491	2.36491
Kdm4dl	predicted gene 27205 [Source:MGI Symbol;Acc:MGI:5521048]	-1.25526	1.06413	FALSE	opposite	-2.31939	2.31939
Smim3	small integral membrane protein 3 [Source:MGI Symbol;Acc:MGI:1917088]	-1.39796	0.890383	FALSE	opposite	-2.28834	2.28834
Pmaip1	phorbol-12-myristate-13-acetate-induced protein 1 [Source:MGI Symbol;Acc:MGI:1930146]	-0.933359	1.34026	FALSE	opposite	-2.27362	2.27362
Polr3e	polymerase (RNA) III (DNA directed) polypeptide E [Source:MGI Symbol;Acc:MGI:1349452]	-1.44336	0.825712	FALSE	opposite	-2.26907	2.26907
Gsx1	GS homeobox 1 [Source:MGI Symbol;Acc:MGI:95842]	1.08246	-1.18536	opposite	FALSE	2.26782	2.26782
BC049352	cDNA sequence BC049352 [Source:MGI Symbol;Acc:MGI:3040681]	-1.18521	1.0658	FALSE	opposite	-2.25102	2.25102
Txnip	thioredoxin interacting protein [Source:MGI Symbol;Acc:MGI:1889549]	-1.51436	0.733826	FALSE	opposite	-2.24819	2.24819
Gsg2	germ cell-specific gene 2 [Source:MGI Symbol;Acc:MGI:1194498]	1	-1.22651	opposite	FALSE	2.22651	2.22651
Mrpl41	mitochondrial ribosomal protein L41 [Source:MGI Symbol;Acc:MGI:1333816]	-1.24796	0.969048	FALSE	opposite	-2.21701	2.21701
Cd101	CD101 antigen [Source:MGI Symbol;Acc:MGI:2685862]	-0.991067	1.20353	FALSE	opposite	-2.1946	2.1946
Alpl	alkaline phosphatase, liver/bone/kidney [Source:MGI Symbol;Acc:MGI:87983]	0.99333	-1.16136	opposite	FALSE	2.15469	2.15469
Klhl30	kelch-like 30 [Source:MGI Symbol;Acc:MGI:1918038]	0.807355	-1.32193	opposite	FALSE	2.12928	2.12928
Pycr1	pyrroline-5-carboxylate reductase 1 [Source:MGI Symbol;Acc:MGI:2384795]	1.13482	-0.977877	opposite	FALSE	2.1127	2.1127
Slc38a5	solute carrier family 38, member 5 [Source:MGI Symbol;Acc:MGI:2148066]	1.05722	-1.05038	opposite	FALSE	2.1076	2.1076
Hist1h1c	histone cluster 1, H1c [Source:MGI Symbol;Acc:MGI:1931526]	-0.909293	1.18249	FALSE	opposite	-2.09179	2.09179
Kif2c	kinesin family member 2C [Source:MGI Symbol;Acc:MGI:1921054]	0.836501	-1.24207	opposite	FALSE	2.07858	2.07858
Loxl1	lysyl oxidase-like 1 [Source:MGI Symbol;Acc:MGI:106096]	0.711472	-1.361	opposite	FALSE	2.07247	2.07247
Ppp1r1b	protein phosphatase 1, regulatory (inhibitor) subunit 1B [Source:MGI Symbol;Acc:MGI:94860]	-1.25205	0.807959	FALSE	opposite	-2.06001	2.06001
Gm266	predicted gene 266 [Source:MGI Symbol;Acc:MGI:2685112]	0.956184	-1.0929	opposite	FALSE	2.04909	2.04909
Gpx3	glutathione peroxidase 3 [Source:MGI Symbol;Acc:MGI:105102]	-0.900618	1.11357	FALSE	opposite	-2.01419	2.01419
Kcne4	potassium voltage-gated channel, Isk-related subfamily, gene 4 [Source:MGI Symbol;Acc:MGI:1891125]	0.861121	-1.14918	opposite	FALSE	2.0103	2.0103
Edn1	endothelin 1 [Source:MGI Symbol;Acc:MGI:95283]	-1.28185	0.720786	FALSE	opposite	-2.00264	2.00264
Acer2	alkaline ceramidase 2 [Source:MGI Symbol;Acc:MGI:1920932]	-1.14389	0.855831	FALSE	opposite	-1.99973	1.99973
Tnfsf10	tumor necrosis factor (ligand) superfamily, member 10 [Source:MGI Symbol;Acc:MGI:107414]	1.31626	-0.67423	opposite	FALSE	1.99049	1.99049
Sspo	SCO-spondin [Source:MGI Symbol;Acc:MGI:2674311]	-0.753839	1.22239	FALSE	opposite	-1.97623	1.97623
Slc16a3	solute carrier family 16 (monocarboxylic acid transporters), member 3 [Source:MGI Symbol;Acc:MGI:1933438]	-0.790312	1.18076	FALSE	opposite	-1.97107	1.97107
Aurkb	aurora kinase B [Source:MGI Symbol;Acc:MGI:107168]	0.710493	-1.25601	opposite	FALSE	1.96651	1.96651
Kcna5	potassium voltage-gated channel, shaker-related subfamily, member 5 [Source:MGI Symbol;Acc:MGI:96662]	-1.0224	0.932829	FALSE	opposite	-1.95523	1.95523
Kdelr3	KDEL (Lys-Asp-Glu-Leu) endoplasmic reticulum protein retention receptor 3 [Source:MGI Symbol;Acc:MGI:2145953]	0.588596	-1.35242	opposite	FALSE	1.94101	1.94101
AW495222	expressed sequence AW495222 [Source:MGI Symbol;Acc:MGI:2145435]	-0.838938	1.1004	FALSE	opposite	-1.93934	1.93934
Notum	notum pectinacetylesterase homolog (Drosophila) [Source:MGI Symbol;Acc:MGI:1924833]	0.882705	-1.05143	opposite	FALSE	1.93413	1.93413
Acacb	acetyl-Coenzyme A carboxylase beta [Source:MGI Symbol;Acc:MGI:2140940]	-0.908125	1.02364	FALSE	opposite	-1.93177	1.93177
Mmp14	matrix metallopeptidase 14 (membrane-inserted) [Source:MGI Symbol;Acc:MGI:101900]	0.943608	-0.982001	opposite	FALSE	1.92561	1.92561
Tnc	tenascin C [Source:MGI Symbol;Acc:MGI:101922]	1.17518	-0.749082	opposite	FALSE	1.92427	1.92427
Hpgd	hydroxyprostaglandin dehydrogenase 15 (NAD) [Source:MGI Symbol;Acc:MGI:108085]	1.14886	-0.774879	opposite	FALSE	1.92374	1.92374
Aspm	asp (abnormal spindle)-like, microcephaly associated (Drosophila) [Source:MGI Symbol;Acc:MGI:1334448]	0.949727	-0.956931	opposite	FALSE	1.90666	1.90666
Casc5	cancer susceptibility candidate 5 [Source:MGI Symbol;Acc:MGI:1923714]	0.962847	-0.917538	opposite	FALSE	1.88038	1.88038
Col12a1	collagen, type XII, alpha 1 [Source:MGI Symbol;Acc:MGI:88448]	0.662071	-1.21459	opposite	FALSE	1.87667	1.87667
Hr	hairless [Source:MGI Symbol;Acc:MGI:96223]	-1.03106	0.844891	FALSE	opposite	-1.87595	1.87595
Dlgap5	discs, large (Drosophila) homolog-associated protein 5 [Source:MGI Symbol;Acc:MGI:2183453]	0.686842	-1.18253	opposite	FALSE	1.86937	1.86937
Hes5	hairy and enhancer of split 5 (Drosophila) [Source:MGI Symbol;Acc:MGI:104876]	1.01073	-0.854634	opposite	FALSE	1.86536	1.86536
Thbd	thrombomodulin [Source:MGI Symbol;Acc:MGI:98736]	0.647531	-1.21283	opposite	FALSE	1.86036	1.86036
Fas	Fas (TNF receptor superfamily member 6) [Source:MGI Symbol;Acc:MGI:95484]	-0.865591	0.961526	FALSE	opposite	-1.82712	1.82712
Mgmt	O-6-methylguanine-DNA methyltransferase [Source:MGI Symbol;Acc:MGI:96977]	-0.560405	1.25909	FALSE	opposite	-1.81949	1.81949
Adipor2	adiponectin receptor 2 [Source:MGI Symbol;Acc:MGI:93830]	-1.04636	0.756353	FALSE	opposite	-1.80272	1.80272
Bst2	bone marrow stromal cell antigen 2 [Source:MGI Symbol;Acc:MGI:1916800]	1.09311	-0.704802	opposite	FALSE	1.79791	1.79791
Cth	cystathionase (cystathionine gamma-lyase) [Source:MGI Symbol;Acc:MGI:1339968]	-0.911773	0.877935	FALSE	opposite	-1.78971	1.78971
2810417H13Rik	RIKEN cDNA 2810417H13 gene [Source:MGI Symbol;Acc:MGI:1915276]	0.755662	-1.03317	opposite	FALSE	1.78883	1.78883
Pxmp2	peroxisomal membrane protein 2 [Source:MGI Symbol;Acc:MGI:107487]	-0.923832	0.855108	FALSE	opposite	-1.77894	1.77894
Gm16316	predicted gene 16316 [Source:MGI Symbol;Acc:MGI:3826530]	-0.9137	0.863938	FALSE	opposite	-1.77764	1.77764
Rsad2	radical S-adenosyl methionine domain containing 2 [Source:MGI Symbol;Acc:MGI:1929628]	0.840644	-0.928615	opposite	FALSE	1.76926	1.76926
Igsf1	immunoglobulin superfamily, member 1 [Source:MGI Symbol;Acc:MGI:2147913]	0.614011	-1.14641	opposite	FALSE	1.76042	1.76042
Ddit4	DNA-damage-inducible transcript 4 [Source:MGI Symbol;Acc:MGI:1921997]	-0.976999	0.781022	FALSE	opposite	-1.75802	1.75802
Id3	inhibitor of DNA binding 3 [Source:MGI Symbol;Acc:MGI:96398]	0.763131	-0.991526	opposite	FALSE	1.75466	1.75466
Gm16958	predicted gene, 16958 [Source:MGI Symbol;Acc:MGI:4439882]	-0.645198	1.10692	FALSE	opposite	-1.75211	1.75211
Neil3	nei like 3 (E. coli) [Source:MGI Symbol;Acc:MGI:2384588]	0.788496	-0.958006	opposite	FALSE	1.7465	1.7465
Ube2c	ubiquitin-conjugating enzyme E2C [Source:MGI Symbol;Acc:MGI:1915862]	0.446357	-1.29708	opposite	FALSE	1.74344	1.74344
Trim17	tripartite motif-containing 17 [Source:MGI Symbol;Acc:MGI:1861440]	-0.497789	1.24424	FALSE	opposite	-1.74203	1.74203
Gatsl3	GATS protein-like 3 [Source:MGI Symbol;Acc:MGI:1919212]	-1.00551	0.724203	FALSE	opposite	-1.72971	1.72971
Wfdc18	WAP four-disulfide core domain 18 [Source:MGI Symbol;Acc:MGI:107506]	-1.04081	0.682971	FALSE	opposite	-1.72378	1.72378
Bub1b	budding uninhibited by benzimidazoles 1 homolog, beta (S. cerevisiae) [Source:MGI Symbol;Acc:MGI:1333889]	0.73024	-0.990955	opposite	FALSE	1.72119	1.72119
Dtl	denticleless homolog (Drosophila) [Source:MGI Symbol;Acc:MGI:1924093]	0.805272	-0.906891	opposite	FALSE	1.71216	1.71216
Fam64a	family with sequence similarity 64, member A [Source:MGI Symbol;Acc:MGI:1924434]	0.685489	-1.01968	opposite	FALSE	1.70517	1.70517
Klf15	Kruppel-like factor 15 [Source:MGI Symbol;Acc:MGI:1929988]	-1.06546	0.627982	FALSE	opposite	-1.69344	1.69344
Chaf1b	chromatin assembly factor 1, subunit B (p60) [Source:MGI Symbol;Acc:MGI:1314881]	0.706269	-0.983512	opposite	FALSE	1.68978	1.68978
Gm21984	predicted gene 21984 [Source:MGI Symbol;Acc:MGI:5439453]	-0.830075	0.857042	FALSE	opposite	-1.68712	1.68712
Crispld1	cysteine-rich secretory protein LCCL domain containing 1 [Source:MGI Symbol;Acc:MGI:1934666]	0.770799	-0.915504	opposite	FALSE	1.6863	1.6863
LRRC8A	predicted gene, 28035 [Source:MGI Symbol;Acc:MGI:5547771]	-0.627004	1.05739	FALSE	opposite	-1.68439	1.68439
Pnpla2	patatin-like phospholipase domain containing 2 [Source:MGI Symbol;Acc:MGI:1914103]	-1.09486	0.587343	FALSE	opposite	-1.6822	1.6822
Gstm1	glutathione S-transferase, mu 1 [Source:MGI Symbol;Acc:MGI:95860]	-0.926141	0.755135	FALSE	opposite	-1.68128	1.68128
Fzd10	frizzled homolog 10 (Drosophila) [Source:MGI Symbol;Acc:MGI:2136761]	1.18646	-0.494667	opposite	FALSE	1.68112	1.68112
Dao	D-amino acid oxidase [Source:MGI Symbol;Acc:MGI:94859]	-0.643465	1.02585	FALSE	opposite	-1.66932	1.66932
Ncapg	non-SMC condensin I complex, subunit G [Source:MGI Symbol;Acc:MGI:1930197]	0.830873	-0.834322	opposite	FALSE	1.66519	1.66519
Rasl2-9	RAS-like, family 2, locus 9 [Source:MGI Symbol;Acc:MGI:104605]	-0.693022	0.968636	FALSE	opposite	-1.66166	1.66166
Fabp7	fatty acid binding protein 7, brain [Source:MGI Symbol;Acc:MGI:101916]	0.845376	-0.805479	opposite	FALSE	1.65086	1.65086
Ccnb2	cyclin B2 [Source:MGI Symbol;Acc:MGI:88311]	0.53842	-1.11052	opposite	FALSE	1.64894	1.64894
Dcxr	dicarbonyl L-xylulose reductase [Source:MGI Symbol;Acc:MGI:1915130]	-0.645512	1.00082	FALSE	opposite	-1.64633	1.64633
Phyhd1	phytanoyl-CoA dioxygenase domain containing 1 [Source:MGI Symbol;Acc:MGI:3612860]	-0.738652	0.907678	FALSE	opposite	-1.64633	1.64633
Arrdc3	arrestin domain containing 3 [Source:MGI Symbol;Acc:MGI:2145242]	-0.726997	0.912297	FALSE	opposite	-1.63929	1.63929
Cxcl12	chemokine (C-X-C motif) ligand 12 [Source:MGI Symbol;Acc:MGI:103556]	0.910182	-0.721734	opposite	FALSE	1.63192	1.63192
Heph	hephaestin [Source:MGI Symbol;Acc:MGI:1332240]	-0.674662	0.952685	FALSE	opposite	-1.62735	1.62735
Gpr50	G-protein-coupled receptor 50 [Source:MGI Symbol;Acc:MGI:1333877]	0.659771	-0.957517	opposite	FALSE	1.61729	1.61729
Angptl2	angiopoietin-like 2 [Source:MGI Symbol;Acc:MGI:1347002]	0.751452	-0.840029	opposite	FALSE	1.59148	1.59148
C430049B03Rik	RIKEN cDNA C430049B03 gene [Source:MGI Symbol;Acc:MGI:1924903]	0.751502	-0.838081	opposite	FALSE	1.58958	1.58958
Espl1	extra spindle pole bodies 1 (S. cerevisiae) [Source:MGI Symbol;Acc:MGI:2146156]	0.764286	-0.813781	opposite	FALSE	1.57807	1.57807
Ddo	D-aspartate oxidase [Source:MGI Symbol;Acc:MGI:1925528]	-0.695063	0.882326	FALSE	opposite	-1.57739	1.57739
Mycn	v-myc myelocytomatosis viral related oncogene, neuroblastoma derived (avian) [Source:MGI Symbol;Acc:MGI:97357]	0.987378	-0.584963	opposite	FALSE	1.57234	1.57234
T2	brachyury 2 [Source:MGI Symbol;Acc:MGI:104658]	-0.674014	0.896164	FALSE	opposite	-1.57018	1.57018
Aplnr	apelin receptor [Source:MGI Symbol;Acc:MGI:1346086]	1.06487	-0.493282	opposite	FALSE	1.55815	1.55815
Cd248	CD248 antigen, endosialin [Source:MGI Symbol;Acc:MGI:1917695]	0.748984	-0.797668	opposite	FALSE	1.54665	1.54665
Mcm6	minichromosome maintenance deficient 6 (MIS5 homolog, S. pombe) (S. cerevisiae) [Source:MGI Symbol;Acc:MGI:1298227]	0.84445	-0.695208	opposite	FALSE	1.53966	1.53966
Rorc	RAR-related orphan receptor gamma [Source:MGI Symbol;Acc:MGI:104856]	-0.670152	0.864754	FALSE	opposite	-1.53491	1.53491
Elf5	E74-like factor 5 [Source:MGI Symbol;Acc:MGI:1335079]	0.623624	-0.909161	opposite	FALSE	1.53278	1.53278
Slc13a5	solute carrier family 13 (sodium-dependent citrate transporter), member 5 [Source:MGI Symbol;Acc:MGI:3037150]	0.856186	-0.675692	opposite	FALSE	1.53188	1.53188
Rnase1	ribonuclease, RNase A family, 1 (pancreatic) [Source:MGI Symbol;Acc:MGI:97919]	-0.766225	0.764574	FALSE	opposite	-1.5308	1.5308
Cdk1	cyclin-dependent kinase 1 [Source:MGI Symbol;Acc:MGI:88351]	0.462343	-1.06689	opposite	FALSE	1.52924	1.52924
Adm	adrenomedullin [Source:MGI Symbol;Acc:MGI:108058]	-0.740732	0.781926	FALSE	opposite	-1.52266	1.52266
Itga6	integrin alpha 6 [Source:MGI Symbol;Acc:MGI:96605]	0.688467	-0.825931	opposite	FALSE	1.5144	1.5144
Zfand4	zinc finger, AN1-type domain 4 [Source:MGI Symbol;Acc:MGI:1914742]	-0.660344	0.847015	FALSE	opposite	-1.50736	1.50736
Mki67	antigen identified by monoclonal antibody Ki 67 [Source:MGI Symbol;Acc:MGI:106035]	0.481605	-1.01424	opposite	FALSE	1.49585	1.49585
Mex3a	mex3 homolog A (C. elegans) [Source:MGI Symbol;Acc:MGI:1919890]	0.930378	-0.561427	opposite	FALSE	1.4918	1.4918
AI429214	expressed sequence AI429214 [Source:MGI Symbol;Acc:MGI:2142538]	-0.78637	0.698375	FALSE	opposite	-1.48474	1.48474
Egfl6	EGF-like-domain, multiple 6 [Source:MGI Symbol;Acc:MGI:1858599]	0.863138	-0.621088	opposite	FALSE	1.48423	1.48423
Pbk	PDZ binding kinase [Source:MGI Symbol;Acc:MGI:1289156]	0.578536	-0.90414	opposite	FALSE	1.48268	1.48268
Mertk	c-mer proto-oncogene tyrosine kinase [Source:MGI Symbol;Acc:MGI:96965]	-0.640401	0.833388	FALSE	opposite	-1.47379	1.47379
Sox7	SRY (sex determining region Y)-box 7 [Source:MGI Symbol;Acc:MGI:98369]	0.981331	-0.484481	opposite	FALSE	1.46581	1.46581
Igf1	insulin-like growth factor 1 [Source:MGI Symbol;Acc:MGI:96432]	0.461298	-0.998734	opposite	FALSE	1.46003	1.46003
Ccna2	cyclin A2 [Source:MGI Symbol;Acc:MGI:108069]	0.57691	-0.880205	opposite	FALSE	1.45712	1.45712
Vegfc	vascular endothelial growth factor C [Source:MGI Symbol;Acc:MGI:109124]	0.690858	-0.765535	opposite	FALSE	1.45639	1.45639
Pnpla7	patatin-like phospholipase domain containing 7 [Source:MGI Symbol;Acc:MGI:2385325]	-0.626038	0.827803	FALSE	opposite	-1.45384	1.45384
Gm26645	predicted gene, 26645 [Source:MGI Symbol;Acc:MGI:5477139]	0.574781	-0.872696	opposite	FALSE	1.44748	1.44748
Nusap1	nucleolar and spindle associated protein 1 [Source:MGI Symbol;Acc:MGI:2675669]	0.487665	-0.95744	opposite	FALSE	1.4451	1.4451
Ncan	neurocan [Source:MGI Symbol;Acc:MGI:104694]	0.79417	-0.636093	opposite	FALSE	1.43026	1.43026
Top2a	topoisomerase (DNA) II alpha [Source:MGI Symbol;Acc:MGI:98790]	0.573363	-0.856066	opposite	FALSE	1.42943	1.42943
Entpd2	ectonucleoside triphosphate diphosphohydrolase 2 [Source:MGI Symbol;Acc:MGI:1096863]	0.597725	-0.825483	opposite	FALSE	1.42321	1.42321
Slc24a4	solute carrier family 24 (sodium/potassium/calcium exchanger), member 4 [Source:MGI Symbol;Acc:MGI:2447362]	-0.70112	0.714822	FALSE	opposite	-1.41594	1.41594
D630039A03Rik	RIKEN cDNA D630039A03 gene [Source:MGI Symbol;Acc:MGI:2442889]	-0.728698	0.686471	FALSE	opposite	-1.41517	1.41517
Prc1	protein regulator of cytokinesis 1 [Source:MGI Symbol;Acc:MGI:1858961]	0.581324	-0.833706	opposite	FALSE	1.41503	1.41503
Uhrf1	ubiquitin-like, containing PHD and RING finger domains, 1 [Source:MGI Symbol;Acc:MGI:1338889]	0.823355	-0.584963	opposite	FALSE	1.40832	1.40832
Depdc1b	DEP domain containing 1B [Source:MGI Symbol;Acc:MGI:2145425]	0.671164	-0.734502	opposite	FALSE	1.40567	1.40567
Cdkn1a	cyclin-dependent kinase inhibitor 1A (P21) [Source:MGI Symbol;Acc:MGI:104556]	-0.783853	0.618935	FALSE	opposite	-1.40279	1.40279
Tnfrsf11b	tumor necrosis factor receptor superfamily, member 11b (osteoprotegerin) [Source:MGI Symbol;Acc:MGI:109587]	0.746592	-0.647972	opposite	FALSE	1.39456	1.39456
Bdh2	3-hydroxybutyrate dehydrogenase, type 2 [Source:MGI Symbol;Acc:MGI:1917022]	-0.722131	0.668058	FALSE	opposite	-1.39019	1.39019
Steap3	STEAP family member 3 [Source:MGI Symbol;Acc:MGI:1915678]	0.576894	-0.796827	opposite	FALSE	1.37372	1.37372
2810459M11Rik	RIKEN cDNA 2810459M11 gene [Source:MGI Symbol;Acc:MGI:1920042]	0.848934	-0.518535	opposite	FALSE	1.36747	1.36747
Dnah8	dynein, axonemal, heavy chain 8 [Source:MGI Symbol;Acc:MGI:107714]	0.724156	-0.643177	opposite	FALSE	1.36733	1.36733
Slc16a9	solute carrier family 16 (monocarboxylic acid transporters), member 9 [Source:MGI Symbol;Acc:MGI:1914109]	-0.693105	0.670845	FALSE	opposite	-1.36395	1.36395
Btbd16	BTB (POZ) domain containing 16 [Source:MGI Symbol;Acc:MGI:3045247]	-0.847784	0.500374	FALSE	opposite	-1.34816	1.34816
Pappa	pregnancy-associated plasma protein A [Source:MGI Symbol;Acc:MGI:97479]	0.557916	-0.787186	opposite	FALSE	1.3451	1.3451
Serpinh1	serine (or cysteine) peptidase inhibitor, clade H, member 1 [Source:MGI Symbol;Acc:MGI:88283]	0.376219	-0.96687	opposite	FALSE	1.34309	1.34309
Nes	nestin [Source:MGI Symbol;Acc:MGI:101784]	0.500865	-0.841763	opposite	FALSE	1.34263	1.34263
Col8a1	collagen, type VIII, alpha 1 [Source:MGI Symbol;Acc:MGI:88463]	0.504536	-0.833214	opposite	FALSE	1.33775	1.33775
Ets1	E26 avian leukemia oncogene 1, 5' domain [Source:MGI Symbol;Acc:MGI:95455]	0.877496	-0.460111	opposite	FALSE	1.33761	1.33761
Lrrc8a	leucine rich repeat containing 8A [Source:MGI Symbol;Acc:MGI:2652847]	-0.965169	0.367439	FALSE	opposite	-1.33261	1.33261
C130074G19Rik	RIKEN cDNA C130074G19 gene [Source:MGI Symbol;Acc:MGI:2444831]	0.558046	-0.762388	opposite	FALSE	1.32043	1.32043
Prodh	proline dehydrogenase [Source:MGI Symbol;Acc:MGI:97770]	-0.835183	0.48186	FALSE	opposite	-1.31704	1.31704
Ccnb1	cyclin B1 [Source:MGI Symbol;Acc:MGI:88302]	0.522421	-0.792342	opposite	FALSE	1.31476	1.31476
Colq	collagen-like tail subunit (single strand of homotrimer) of asymmetric acetylcholinesterase [Source:MGI Symbol;Acc:MGI:1338761]	-0.451989	0.85599	FALSE	opposite	-1.30798	1.30798
Phactr3	phosphatase and actin regulator 3 [Source:MGI Symbol;Acc:MGI:1921439]	-0.737562	0.562762	FALSE	opposite	-1.30032	1.30032
Fam214a	family with sequence similarity 214, member A [Source:MGI Symbol;Acc:MGI:2387648]	-0.470656	0.827087	FALSE	opposite	-1.29774	1.29774
Glul	glutamate-ammonia ligase (glutamine synthetase) [Source:MGI Symbol;Acc:MGI:95739]	-0.815772	0.481251	FALSE	opposite	-1.29702	1.29702
Heyl	hairy/enhancer-of-split related with YRPW motif-like [Source:MGI Symbol;Acc:MGI:1860511]	0.729446	-0.56474	opposite	FALSE	1.29419	1.29419
Tjap1	tight junction associated protein 1 [Source:MGI Symbol;Acc:MGI:1921344]	-0.593197	0.685424	FALSE	opposite	-1.27862	1.27862
Ednrb	endothelin receptor type B [Source:MGI Symbol;Acc:MGI:102720]	0.796586	-0.480792	opposite	FALSE	1.27738	1.27738
Adhfe1	alcohol dehydrogenase, iron containing, 1 [Source:MGI Symbol;Acc:MGI:1923437]	-0.393443	0.872265	FALSE	opposite	-1.26571	1.26571
Slc13a3	solute carrier family 13 (sodium-dependent dicarboxylate transporter), member 3 [Source:MGI Symbol;Acc:MGI:2149635]	0.444628	-0.819536	opposite	FALSE	1.26416	1.26416
Abcc4	ATP-binding cassette, sub-family C (CFTR/MRP), member 4 [Source:MGI Symbol;Acc:MGI:2443111]	-0.494813	0.765648	FALSE	opposite	-1.26046	1.26046
Itgb3	integrin beta 3 [Source:MGI Symbol;Acc:MGI:96612]	0.563136	-0.69196	opposite	FALSE	1.2551	1.2551
2010001M06Rik	abhydrolase domain containing 11, opposite strand [Source:MGI Symbol;Acc:MGI:1917062]	-0.458945	0.794383	FALSE	opposite	-1.25333	1.25333
BC064078	cDNA sequence BC064078 [Source:MGI Symbol;Acc:MGI:3040692]	-0.687737	0.5534	FALSE	opposite	-1.24114	1.24114
Hist1h4h	histone cluster 1, H4h [Source:MGI Symbol;Acc:MGI:2448427]	-0.482942	0.752861	FALSE	opposite	-1.2358	1.2358
Fli1	Friend leukemia integration 1 [Source:MGI Symbol;Acc:MGI:95554]	0.46421	-0.769838	opposite	FALSE	1.23405	1.23405
Per1	period circadian clock 1 [Source:MGI Symbol;Acc:MGI:1098283]	-0.868386	0.365511	FALSE	opposite	-1.2339	1.2339
Slc43a2	solute carrier family 43, member 2 [Source:MGI Symbol;Acc:MGI:2442746]	-0.462211	0.769125	FALSE	opposite	-1.23134	1.23134
Ier5	immediate early response 5 [Source:MGI Symbol;Acc:MGI:1337072]	0.648698	-0.573439	opposite	FALSE	1.22214	1.22214
Scrg1	scrapie responsive gene 1 [Source:MGI Symbol;Acc:MGI:1328308]	-0.800825	0.418516	FALSE	opposite	-1.21934	1.21934
Rab11fip1	RAB11 family interacting protein 1 (class I) [Source:MGI Symbol;Acc:MGI:1923017]	-0.45284	0.762961	FALSE	opposite	-1.2158	1.2158
Apln	apelin [Source:MGI Symbol;Acc:MGI:1353624]	0.547014	-0.667627	opposite	FALSE	1.21464	1.21464
Shroom1	shroom family member 1 [Source:MGI Symbol;Acc:MGI:1919024]	-0.661433	0.553131	FALSE	opposite	-1.21456	1.21456
Barx2	BarH-like homeobox 2 [Source:MGI Symbol;Acc:MGI:109617]	0.427869	-0.785475	opposite	FALSE	1.21334	1.21334
Hbegf	heparin-binding EGF-like growth factor [Source:MGI Symbol;Acc:MGI:96070]	0.48211	-0.721991	opposite	FALSE	1.2041	1.2041
Sdpr	serum deprivation response [Source:MGI Symbol;Acc:MGI:99513]	-0.767245	0.434021	FALSE	opposite	-1.20127	1.20127
Angpt4	angiopoietin 4 [Source:MGI Symbol;Acc:MGI:1336887]	-0.581073	0.618672	FALSE	opposite	-1.19974	1.19974
Atg9b	autophagy related 9B [Source:MGI Symbol;Acc:MGI:2685420]	-0.417514	0.774649	FALSE	opposite	-1.19216	1.19216
Cyp2j9	cytochrome P450, family 2, subfamily j, polypeptide 9 [Source:MGI Symbol;Acc:MGI:1921769]	-0.5787	0.609502	FALSE	opposite	-1.1882	1.1882
Icosl	icos ligand [Source:MGI Symbol;Acc:MGI:1354701]	-0.715397	0.470651	FALSE	opposite	-1.18605	1.18605
Cenpf	centromere protein F [Source:MGI Symbol;Acc:MGI:1313302]	0.552139	-0.631505	opposite	FALSE	1.18364	1.18364
Akr1c13	aldo-keto reductase family 1, member C13 [Source:MGI Symbol;Acc:MGI:1351662]	-0.541461	0.642106	FALSE	opposite	-1.18357	1.18357
1700086L19Rik	RIKEN cDNA 1700086L19 gene [Source:MGI Symbol;Acc:MGI:1921534]	0.644284	-0.538607	opposite	FALSE	1.18289	1.18289
Ccdc3	coiled-coil domain containing 3 [Source:MGI Symbol;Acc:MGI:1921436]	-0.679574	0.502751	FALSE	opposite	-1.18233	1.18233
Tmem200a	transmembrane protein 200A [Source:MGI Symbol;Acc:MGI:1924470]	0.643856	-0.53731	opposite	FALSE	1.18117	1.18117
Vcam1	vascular cell adhesion molecule 1 [Source:MGI Symbol;Acc:MGI:98926]	0.66699	-0.507726	opposite	FALSE	1.17472	1.17472
Piezo2	piezo-type mechanosensitive ion channel component 2 [Source:MGI Symbol;Acc:MGI:1918781]	0.488311	-0.68378	opposite	FALSE	1.17209	1.17209
Tmem51	transmembrane protein 51 [Source:MGI Symbol;Acc:MGI:2384874]	0.474277	-0.691385	opposite	FALSE	1.16566	1.16566
Sesn1	sestrin 1 [Source:MGI Symbol;Acc:MGI:2155278]	-0.664973	0.494387	FALSE	opposite	-1.15936	1.15936
Trp53inp1	transformation related protein 53 inducible nuclear protein 1 [Source:MGI Symbol;Acc:MGI:1926609]	-0.434347	0.719208	FALSE	opposite	-1.15355	1.15355
Fos	FBJ osteosarcoma oncogene [Source:MGI Symbol;Acc:MGI:95574]	0.502844	-0.647599	opposite	FALSE	1.15044	1.15044
Ly6a	lymphocyte antigen 6 complex, locus A [Source:MGI Symbol;Acc:MGI:107527]	-0.669777	0.478047	FALSE	opposite	-1.14782	1.14782
Fam20a	family with sequence similarity 20, member A [Source:MGI Symbol;Acc:MGI:2388266]	-0.598442	0.54853	FALSE	opposite	-1.14697	1.14697
Mast3	microtubule associated serine/threonine kinase 3 [Source:MGI Symbol;Acc:MGI:2683541]	-0.566016	0.576539	FALSE	opposite	-1.14255	1.14255
Ednra	endothelin receptor type A [Source:MGI Symbol;Acc:MGI:105923]	0.679311	-0.461359	opposite	FALSE	1.14067	1.14067
Ckap2l	cytoskeleton associated protein 2-like [Source:MGI Symbol;Acc:MGI:1917716]	0.569736	-0.566662	opposite	FALSE	1.1364	1.1364
Vstm4	V-set and transmembrane domain containing 4 [Source:MGI Symbol;Acc:MGI:2444633]	0.297938	-0.837015	opposite	FALSE	1.13495	1.13495
Sgk3	serum/glucocorticoid regulated kinase 3 [Source:MGI Symbol;Acc:MGI:2182368]	-0.500019	0.626163	FALSE	opposite	-1.12618	1.12618
Prrx1	paired related homeobox 1 [Source:MGI Symbol;Acc:MGI:97712]	0.580346	-0.542454	opposite	FALSE	1.1228	1.1228
Glns-ps1	glutamine synthetase pseudogene 1 [Source:MGI Symbol;Acc:MGI:95740]	-0.475742	0.641509	FALSE	opposite	-1.11725	1.11725
Tma16	translation machinery associated 16 homolog (S. cerevisiae) [Source:MGI Symbol;Acc:MGI:1913532]	-0.461671	0.653349	FALSE	opposite	-1.11502	1.11502
Cxcr4	chemokine (C-X-C motif) receptor 4 [Source:MGI Symbol;Acc:MGI:109563]	0.636668	-0.475759	opposite	FALSE	1.11243	1.11243
Slc35d2	solute carrier family 35, member D2 [Source:MGI Symbol;Acc:MGI:1917734]	-0.459432	0.649159	FALSE	opposite	-1.10859	1.10859
Itpk1	inositol 1,3,4-triphosphate 5/6 kinase [Source:MGI Symbol;Acc:MGI:2446159]	-0.695374	0.412073	FALSE	opposite	-1.10745	1.10745
Phlda1	pleckstrin homology-like domain, family A, member 1 [Source:MGI Symbol;Acc:MGI:1096880]	0.461309	-0.634565	opposite	FALSE	1.09587	1.09587
Zfp536	zinc finger protein 536 [Source:MGI Symbol;Acc:MGI:1926102]	-0.403073	0.691753	FALSE	opposite	-1.09483	1.09483
Emp1	epithelial membrane protein 1 [Source:MGI Symbol;Acc:MGI:107941]	0.469015	-0.625143	opposite	FALSE	1.09416	1.09416
Tdgf1	teratocarcinoma-derived growth factor 1 [Source:MGI Symbol;Acc:MGI:98658]	-0.521166	0.570688	FALSE	opposite	-1.09185	1.09185
Bgn	biglycan [Source:MGI Symbol;Acc:MGI:88158]	0.476498	-0.613384	opposite	FALSE	1.08988	1.08988
Efhd1	EF hand domain containing 1 [Source:MGI Symbol;Acc:MGI:1921607]	-0.74319	0.345302	FALSE	opposite	-1.08849	1.08849
Pqlc3	PQ loop repeat containing [Source:MGI Symbol;Acc:MGI:2444067]	-0.490051	0.598345	FALSE	opposite	-1.0884	1.0884
Emcn	endomucin [Source:MGI Symbol;Acc:MGI:1891716]	0.308358	-0.777061	opposite	FALSE	1.08542	1.08542
C630043F03Rik	RIKEN cDNA C630043F03 gene [Source:MGI Symbol;Acc:MGI:1915535]	0.701644	-0.382552	opposite	FALSE	1.0842	1.0842
Kif11	kinesin family member 11 [Source:MGI Symbol;Acc:MGI:1098231]	0.409443	-0.672705	opposite	FALSE	1.08215	1.08215
Ephx1	epoxide hydrolase 1, microsomal [Source:MGI Symbol;Acc:MGI:95405]	-0.400287	0.681405	FALSE	opposite	-1.08169	1.08169
Adcy4	adenylate cyclase 4 [Source:MGI Symbol;Acc:MGI:99674]	0.436668	-0.644416	opposite	FALSE	1.08108	1.08108
Fam46a	family with sequence similarity 46, member A [Source:MGI Symbol;Acc:MGI:2670964]	0.50191	-0.571098	opposite	FALSE	1.07301	1.07301
Cdca7	cell division cycle associated 7 [Source:MGI Symbol;Acc:MGI:1914203]	0.574694	-0.497793	opposite	FALSE	1.07249	1.07249
Slc27a1	solute carrier family 27 (fatty acid transporter), member 1 [Source:MGI Symbol;Acc:MGI:1347098]	-0.491986	0.576071	FALSE	opposite	-1.06806	1.06806
Mboat2	membrane bound O-acyltransferase domain containing 2 [Source:MGI Symbol;Acc:MGI:1914466]	-0.363576	0.703345	FALSE	opposite	-1.06692	1.06692
Hnmt	histamine N-methyltransferase [Source:MGI Symbol;Acc:MGI:2153181]	-0.445382	0.618043	FALSE	opposite	-1.06342	1.06342
Fgfrl1	fibroblast growth factor receptor-like 1 [Source:MGI Symbol;Acc:MGI:2150920]	0.598484	-0.464766	opposite	FALSE	1.06325	1.06325
Ndrg2	N-myc downstream regulated gene 2 [Source:MGI Symbol;Acc:MGI:1352498]	-0.485919	0.576977	FALSE	opposite	-1.0629	1.0629
Stra6	stimulated by retinoic acid gene 6 [Source:MGI Symbol;Acc:MGI:107742]	0.490691	-0.568437	opposite	FALSE	1.05913	1.05913
Jag1	jagged 1 [Source:MGI Symbol;Acc:MGI:1095416]	0.541941	-0.514405	opposite	FALSE	1.05635	1.05635
Cd109	CD109 antigen [Source:MGI Symbol;Acc:MGI:2445221]	-0.467012	0.58875	FALSE	opposite	-1.05576	1.05576
Apol8	apolipoprotein L 8 [Source:MGI Symbol;Acc:MGI:2444921]	-0.427793	0.626262	FALSE	opposite	-1.05405	1.05405
Kcne1l	potassium voltage-gated channel, Isk-related family, member 1-like, pseudogene [Source:MGI Symbol;Acc:MGI:1913490]	0.524145	-0.528841	opposite	FALSE	1.05299	1.05299
Cyp4f14	cytochrome P450, family 4, subfamily f, polypeptide 14 [Source:MGI Symbol;Acc:MGI:1927669]	-0.50294	0.547759	FALSE	opposite	-1.0507	1.0507
Cideb	cell death-inducing DNA fragmentation factor, alpha subunit-like effector B [Source:MGI Symbol;Acc:MGI:1270844]	-0.493749	0.543362	FALSE	opposite	-1.03711	1.03711
Itga7	integrin alpha 7 [Source:MGI Symbol;Acc:MGI:102700]	0.373417	-0.6624	opposite	FALSE	1.03582	1.03582
0610007N19Rik	small nucleolar RNA host gene 18 [Source:MGI Symbol;Acc:MGI:1914085]	0.413311	-0.621365	opposite	FALSE	1.03468	1.03468
D7Ertd443e	DNA segment, Chr 7, ERATO Doi 443, expressed [Source:MGI Symbol;Acc:MGI:1196431]	-0.413594	0.621012	FALSE	opposite	-1.03461	1.03461
Ifitm3	interferon induced transmembrane protein 3 [Source:MGI Symbol;Acc:MGI:1913391]	0.412084	-0.618686	opposite	FALSE	1.03077	1.03077
Olfml2b	olfactomedin-like 2B [Source:MGI Symbol;Acc:MGI:2443310]	0.426103	-0.60415	opposite	FALSE	1.03025	1.03025
Prelp	proline arginine-rich end leucine-rich repeat [Source:MGI Symbol;Acc:MGI:2151110]	-0.651105	0.377576	FALSE	opposite	-1.02868	1.02868
Ldhd	lactate dehydrogenase D [Source:MGI Symbol;Acc:MGI:106428]	-0.528458	0.497144	FALSE	opposite	-1.0256	1.0256
Thbs3	thrombospondin 3 [Source:MGI Symbol;Acc:MGI:98739]	-0.590921	0.431689	FALSE	opposite	-1.02261	1.02261
C3	complement component 3 [Source:MGI Symbol;Acc:MGI:88227]	-0.49879	0.52271	FALSE	opposite	-1.0215	1.0215
Slc25a45	solute carrier family 25, member 45 [Source:MGI Symbol;Acc:MGI:2147731]	-0.540317	0.47937	FALSE	opposite	-1.01969	1.01969
Il1r1	interleukin 1 receptor, type I [Source:MGI Symbol;Acc:MGI:96545]	-0.451874	0.566861	FALSE	opposite	-1.01873	1.01873
Fads2	fatty acid desaturase 2 [Source:MGI Symbol;Acc:MGI:1930079]	0.732064	-0.285929	opposite	FALSE	1.01799	1.01799
Creb3l1	cAMP responsive element binding protein 3-like 1 [Source:MGI Symbol;Acc:MGI:1347062]	0.454176	-0.561567	opposite	FALSE	1.01574	1.01574
Pik3ip1	phosphoinositide-3-kinase interacting protein 1 [Source:MGI Symbol;Acc:MGI:1917016]	-0.596688	0.411942	FALSE	opposite	-1.00863	1.00863
Aacs	acetoacetyl-CoA synthetase [Source:MGI Symbol;Acc:MGI:1926144]	0.325969	-0.676284	opposite	FALSE	1.00225	1.00225
Sox18	SRY (sex determining region Y)-box 18 [Source:MGI Symbol;Acc:MGI:103559]	0.491752	-0.51013	opposite	FALSE	1.00188	1.00188
Phldb2	pleckstrin homology-like domain, family B, member 2 [Source:MGI Symbol;Acc:MGI:2444981]	0.472669	-0.528807	opposite	FALSE	1.00148	1.00148
Naprt1	nicotinate phosphoribosyltransferase [Source:MGI Symbol;Acc:MGI:2442664]	0.490904	-0.510122	opposite	FALSE	1.00103	1.00103
Atf3	activating transcription factor 3 [Source:MGI Symbol;Acc:MGI:109384]	-0.405672	0.592511	FALSE	opposite	-0.998183	0.998183
Elovl2	elongation of very long chain fatty acids (FEN1/Elo2, SUR4/Elo3, yeast)-like 2 [Source:MGI Symbol;Acc:MGI:1858960]	-0.34505	0.648973	FALSE	opposite	-0.994022	0.994022
Itgb5	integrin beta 5 [Source:MGI Symbol;Acc:MGI:96614]	-0.659883	0.333213	FALSE	opposite	-0.993097	0.993097
Rcn1	reticulocalbin 1 [Source:MGI Symbol;Acc:MGI:104559]	0.319378	-0.665255	opposite	FALSE	0.984634	0.984634
Tmem100	transmembrane protein 100 [Source:MGI Symbol;Acc:MGI:1915138]	0.536003	-0.448441	opposite	FALSE	0.984444	0.984444
Ndnf	neuron-derived neurotrophic factor [Source:MGI Symbol;Acc:MGI:1915419]	0.544413	-0.439296	opposite	FALSE	0.983709	0.983709
Cacna2d4	calcium channel, voltage-dependent, alpha 2/delta subunit 4 [Source:MGI Symbol;Acc:MGI:2442632]	-0.464372	0.51911	FALSE	opposite	-0.983482	0.983482
Sox21	SRY (sex determining region Y)-box 21 [Source:MGI Symbol;Acc:MGI:2654070]	0.580507	-0.40227	opposite	FALSE	0.982778	0.982778
Mat2a	methionine adenosyltransferase II, alpha [Source:MGI Symbol;Acc:MGI:2443731]	-0.495126	0.487035	FALSE	opposite	-0.982162	0.982162
Mobp	myelin-associated oligodendrocytic basic protein [Source:MGI Symbol;Acc:MGI:108511]	-0.580878	0.399827	FALSE	opposite	-0.980705	0.980705
Nid2	nidogen 2 [Source:MGI Symbol;Acc:MGI:1298229]	0.437314	-0.539774	opposite	FALSE	0.977088	0.977088
Abhd1	abhydrolase domain containing 1 [Source:MGI Symbol;Acc:MGI:1931013]	0.350008	-0.624079	opposite	FALSE	0.974087	0.974087
RP23-103I12.13		0.354239	-0.617186	opposite	FALSE	0.971425	0.971425
Notch4	notch 4 [Source:MGI Symbol;Acc:MGI:107471]	-0.595697	0.365968	FALSE	opposite	-0.961665	0.961665
Tgfb2	transforming growth factor, beta 2 [Source:MGI Symbol;Acc:MGI:98726]	0.633872	-0.327333	opposite	FALSE	0.961205	0.961205
Dusp18	dual specificity phosphatase 18 [Source:MGI Symbol;Acc:MGI:1922469]	0.508979	-0.451521	opposite	FALSE	0.9605	0.9605
Ephb4	Eph receptor B4 [Source:MGI Symbol;Acc:MGI:104757]	0.396998	-0.554782	opposite	FALSE	0.95178	0.95178
Frmpd1	FERM and PDZ domain containing 1 [Source:MGI Symbol;Acc:MGI:2446274]	-0.557098	0.392657	FALSE	opposite	-0.949755	0.949755
Fstl1	follistatin-like 1 [Source:MGI Symbol;Acc:MGI:102793]	0.225032	-0.721908	opposite	FALSE	0.94694	0.94694
Lrrk1	leucine-rich repeat kinase 1 [Source:MGI Symbol;Acc:MGI:2142227]	0.453879	-0.492576	opposite	FALSE	0.946455	0.946455
Ptk2b	PTK2 protein tyrosine kinase 2 beta [Source:MGI Symbol;Acc:MGI:104908]	-0.323863	0.620381	FALSE	opposite	-0.944244	0.944244
Nudt18	nudix (nucleoside diphosphate linked moiety X)-type motif 18 [Source:MGI Symbol;Acc:MGI:2385853]	-0.543233	0.400989	FALSE	opposite	-0.944222	0.944222
Wnt5a	wingless-type MMTV integration site family, member 5A [Source:MGI Symbol;Acc:MGI:98958]	0.58142	-0.356594	opposite	FALSE	0.938014	0.938014
Casq2	calsequestrin 2 [Source:MGI Symbol;Acc:MGI:1309469]	-0.400465	0.533458	FALSE	opposite	-0.933923	0.933923
Ptges	prostaglandin E synthase [Source:MGI Symbol;Acc:MGI:1927593]	0.342511	-0.590936	opposite	FALSE	0.933447	0.933447
Dok4	docking protein 4 [Source:MGI Symbol;Acc:MGI:2148865]	0.405041	-0.523924	opposite	FALSE	0.928965	0.928965
Sox2	SRY (sex determining region Y)-box 2 [Source:MGI Symbol;Acc:MGI:98364]	0.62824	-0.298858	opposite	FALSE	0.927098	0.927098
Arhgef10	Rho guanine nucleotide exchange factor (GEF) 10 [Source:MGI Symbol;Acc:MGI:2444453]	-0.329372	0.597265	FALSE	opposite	-0.926637	0.926637
Plcd4	phospholipase C, delta 4 [Source:MGI Symbol;Acc:MGI:107469]	-0.491936	0.431831	FALSE	opposite	-0.923767	0.923767
Gpc6	glypican 6 [Source:MGI Symbol;Acc:MGI:1346322]	0.500832	-0.421714	opposite	FALSE	0.922545	0.922545
Pter	phosphotriesterase related [Source:MGI Symbol;Acc:MGI:107372]	0.383212	-0.53747	opposite	FALSE	0.920682	0.920682
Slc7a11	solute carrier family 7 (cationic amino acid transporter, y+ system), member 11 [Source:MGI Symbol;Acc:MGI:1347355]	0.566212	-0.353035	opposite	FALSE	0.919247	0.919247
Psd2	pleckstrin and Sec7 domain containing 2 [Source:MGI Symbol;Acc:MGI:1921252]	0.572377	-0.342253	opposite	FALSE	0.91463	0.91463
Klf13	Kruppel-like factor 13 [Source:MGI Symbol;Acc:MGI:1354948]	-0.449149	0.463734	FALSE	opposite	-0.912883	0.912883
Sepp1	selenoprotein P, plasma, 1 [Source:MGI Symbol;Acc:MGI:894288]	-0.553393	0.3592	FALSE	opposite	-0.912593	0.912593
Atp10a	ATPase, class V, type 10A [Source:MGI Symbol;Acc:MGI:1330809]	-0.479936	0.432185	FALSE	opposite	-0.912121	0.912121
Efnb2	ephrin B2 [Source:MGI Symbol;Acc:MGI:105097]	0.395039	-0.516312	opposite	FALSE	0.91135	0.91135
C1qtnf6	C1q and tumor necrosis factor related protein 6 [Source:MGI Symbol;Acc:MGI:1919959]	0.308215	-0.602016	opposite	FALSE	0.910231	0.910231
Alox5	arachidonate 5-lipoxygenase [Source:MGI Symbol;Acc:MGI:87999]	-0.380064	0.527754	FALSE	opposite	-0.907817	0.907817
Hsd17b11	hydroxysteroid (17-beta) dehydrogenase 11 [Source:MGI Symbol;Acc:MGI:2149821]	-0.584854	0.322695	FALSE	opposite	-0.907549	0.907549
Timp4	tissue inhibitor of metalloproteinase 4 [Source:MGI Symbol;Acc:MGI:109125]	-0.529088	0.378102	FALSE	opposite	-0.90719	0.90719
Snrpa1	small nuclear ribonucleoprotein polypeptide A' [Source:MGI Symbol;Acc:MGI:1916231]	-0.181083	0.721529	FALSE	opposite	-0.902612	0.902612
Plekho2	pleckstrin homology domain containing, family O member 2 [Source:MGI Symbol;Acc:MGI:2143132]	0.536562	-0.358764	opposite	FALSE	0.895326	0.895326
Nkx2-2	NK2 homeobox 2 [Source:MGI Symbol;Acc:MGI:97347]	0.474486	-0.420064	opposite	FALSE	0.89455	0.89455
Gmpr	guanosine monophosphate reductase [Source:MGI Symbol;Acc:MGI:1913605]	-0.525574	0.367528	FALSE	opposite	-0.893101	0.893101
Emp2	epithelial membrane protein 2 [Source:MGI Symbol;Acc:MGI:1098726]	0.384834	-0.507576	opposite	FALSE	0.89241	0.89241
Cldn10	claudin 10 [Source:MGI Symbol;Acc:MGI:1913101]	-0.503814	0.386032	FALSE	opposite	-0.889846	0.889846
Nim1	NIM1 serine/threonine protein kinase [Source:MGI Symbol;Acc:MGI:2442399]	0.444905	-0.444939	opposite	FALSE	0.889844	0.889844
Dclre1b	DNA cross-link repair 1B, PSO2 homolog (S. cerevisiae) [Source:MGI Symbol;Acc:MGI:2156057]	-0.392219	0.494251	FALSE	opposite	-0.88647	0.88647
Ltbp1	latent transforming growth factor beta binding protein 1 [Source:MGI Symbol;Acc:MGI:109151]	0.379985	-0.503982	opposite	FALSE	0.883966	0.883966
Tpx2	TPX2, microtubule-associated protein homolog (Xenopus laevis) [Source:MGI Symbol;Acc:MGI:1919369]	0.363779	-0.516463	opposite	FALSE	0.880242	0.880242
Exoc3l4	exocyst complex component 3-like 4 [Source:MGI Symbol;Acc:MGI:1921363]	-0.366016	0.512734	FALSE	opposite	-0.878751	0.878751
Bmp4	bone morphogenetic protein 4 [Source:MGI Symbol;Acc:MGI:88180]	0.438263	-0.437014	opposite	FALSE	0.875277	0.875277
Rnd3	Rho family GTPase 3 [Source:MGI Symbol;Acc:MGI:1921444]	0.504923	-0.366445	opposite	FALSE	0.871368	0.871368
Rgs11	regulator of G-protein signaling 11 [Source:MGI Symbol;Acc:MGI:1354739]	-0.28886	0.579853	FALSE	opposite	-0.868713	0.868713
Cpm	carboxypeptidase M [Source:MGI Symbol;Acc:MGI:1917824]	-0.515493	0.353024	FALSE	opposite	-0.868517	0.868517
Ttc38	tetratricopeptide repeat domain 38 [Source:MGI Symbol;Acc:MGI:2146198]	-0.422727	0.438915	FALSE	opposite	-0.861642	0.861642
Cd38	CD38 antigen [Source:MGI Symbol;Acc:MGI:107474]	-0.308596	0.553032	FALSE	opposite	-0.861628	0.861628
Aldh6a1	aldehyde dehydrogenase family 6, subfamily A1 [Source:MGI Symbol;Acc:MGI:1915077]	-0.184201	0.674184	FALSE	opposite	-0.858385	0.858385
Enpp1	ectonucleotide pyrophosphatase/phosphodiesterase 1 [Source:MGI Symbol;Acc:MGI:97370]	0.438661	-0.418313	opposite	FALSE	0.856974	0.856974
Lss	lanosterol synthase [Source:MGI Symbol;Acc:MGI:1336155]	0.558185	-0.295886	opposite	FALSE	0.854071	0.854071
Fam107b	family with sequence similarity 107, member B [Source:MGI Symbol;Acc:MGI:1913790]	0.505216	-0.344935	opposite	FALSE	0.850151	0.850151
Mgst1	microsomal glutathione S-transferase 1 [Source:MGI Symbol;Acc:MGI:1913850]	-0.52252	0.327616	FALSE	opposite	-0.850135	0.850135
Olfr287	olfactory receptor 287 [Source:MGI Symbol;Acc:MGI:3030121]	-0.326228	0.522324	FALSE	opposite	-0.848553	0.848553
Cyp2s1	cytochrome P450, family 2, subfamily s, polypeptide 1 [Source:MGI Symbol;Acc:MGI:1921384]	-0.354552	0.493366	FALSE	opposite	-0.847918	0.847918
Pltp	phospholipid transfer protein [Source:MGI Symbol;Acc:MGI:103151]	0.323309	-0.522703	opposite	FALSE	0.846011	0.846011
Rtkn	rhotekin [Source:MGI Symbol;Acc:MGI:107371]	-0.628522	0.217387	FALSE	opposite	-0.845909	0.845909
Hrsp12	heat-responsive protein 12 [Source:MGI Symbol;Acc:MGI:1095401]	-0.402469	0.443223	FALSE	opposite	-0.845692	0.845692
Carns1	carnosine synthase 1 [Source:MGI Symbol;Acc:MGI:2147595]	-0.373147	0.471186	FALSE	opposite	-0.844333	0.844333
Kctd13	potassium channel tetramerisation domain containing 13 [Source:MGI Symbol;Acc:MGI:1923739]	-0.553307	0.290637	FALSE	opposite	-0.843945	0.843945
Hn1l	hematological and neurological expressed 1-like [Source:MGI Symbol;Acc:MGI:1196260]	0.347642	-0.494808	opposite	FALSE	0.84245	0.84245
Slco1c1	solute carrier organic anion transporter family, member 1c1 [Source:MGI Symbol;Acc:MGI:1889679]	0.473156	-0.368816	opposite	FALSE	0.841972	0.841972
Cntn2	contactin 2 [Source:MGI Symbol;Acc:MGI:104518]	-0.469004	0.372098	FALSE	opposite	-0.841102	0.841102
Mfap3l	microfibrillar-associated protein 3-like [Source:MGI Symbol;Acc:MGI:1918556]	0.481622	-0.359157	opposite	FALSE	0.840779	0.840779
Matn4	matrilin 4 [Source:MGI Symbol;Acc:MGI:1328314]	0.225977	-0.613337	opposite	FALSE	0.839315	0.839315
Oscp1	organic solute carrier partner 1 [Source:MGI Symbol;Acc:MGI:1916308]	-0.513962	0.324377	FALSE	opposite	-0.838339	0.838339
Spry2	sprouty homolog 2 (Drosophila) [Source:MGI Symbol;Acc:MGI:1345138]	0.497458	-0.340757	opposite	FALSE	0.838215	0.838215
Cthrc1	collagen triple helix repeat containing 1 [Source:MGI Symbol;Acc:MGI:1915838]	0.252562	-0.584963	opposite	FALSE	0.837524	0.837524
2310058D17Rik	RIKEN cDNA 2310058D17 gene [Source:MGI Symbol;Acc:MGI:1922944]	0.444402	-0.392635	opposite	FALSE	0.837037	0.837037
Tst	thiosulfate sulfurtransferase, mitochondrial [Source:MGI Symbol;Acc:MGI:98852]	0.256924	-0.575904	opposite	FALSE	0.832828	0.832828
Nrp1	neuropilin 1 [Source:MGI Symbol;Acc:MGI:106206]	0.561962	-0.267188	opposite	FALSE	0.82915	0.82915
Plxnd1	plexin D1 [Source:MGI Symbol;Acc:MGI:2154244]	0.493815	-0.334566	opposite	FALSE	0.82838	0.82838
Nde1	nuclear distribution gene E homolog 1 (A nidulans) [Source:MGI Symbol;Acc:MGI:1914453]	-0.525265	0.303086	FALSE	opposite	-0.828351	0.828351
Kndc1	kinase non-catalytic C-lobe domain (KIND) containing 1 [Source:MGI Symbol;Acc:MGI:1923734]	-0.32114	0.505516	FALSE	opposite	-0.826657	0.826657
Etv1	ets variant 1 [Source:MGI Symbol;Acc:MGI:99254]	-0.436151	0.387023	FALSE	opposite	-0.823174	0.823174
Gpc4	glypican 4 [Source:MGI Symbol;Acc:MGI:104902]	0.421938	-0.395336	opposite	FALSE	0.817274	0.817274
Klhl6	kelch-like 6 [Source:MGI Symbol;Acc:MGI:2686922]	0.345974	-0.470563	opposite	FALSE	0.816537	0.816537
Atp13a4	ATPase type 13A4 [Source:MGI Symbol;Acc:MGI:1924456]	-0.229272	0.586723	FALSE	opposite	-0.815995	0.815995
Rcan2	regulator of calcineurin 2 [Source:MGI Symbol;Acc:MGI:1858219]	-0.478607	0.337035	FALSE	opposite	-0.815642	0.815642
F3	coagulation factor III [Source:MGI Symbol;Acc:MGI:88381]	-0.495292	0.32001	FALSE	opposite	-0.815302	0.815302
Cpxm2	carboxypeptidase X 2 (M14 family) [Source:MGI Symbol;Acc:MGI:1926006]	0.346463	-0.467359	opposite	FALSE	0.813822	0.813822
Usp54	ubiquitin specific peptidase 54 [Source:MGI Symbol;Acc:MGI:1926037]	-0.288015	0.525017	FALSE	opposite	-0.813032	0.813032
Folh1	folate hydrolase 1 [Source:MGI Symbol;Acc:MGI:1858193]	-0.293713	0.517889	FALSE	opposite	-0.811602	0.811602
Wnt5b	wingless-type MMTV integration site family, member 5B [Source:MGI Symbol;Acc:MGI:98959]	0.355842	-0.455195	opposite	FALSE	0.811036	0.811036
Irak2	interleukin-1 receptor-associated kinase 2 [Source:MGI Symbol;Acc:MGI:2429603]	-0.413979	0.388154	FALSE	opposite	-0.802134	0.802134
Gareml	GRB2 associated, regulator of MAPK1-like [Source:MGI Symbol;Acc:MGI:2685290]	0.467548	-0.332929	opposite	FALSE	0.800477	0.800477
Tenc1	tensin like C1 domain-containing phosphatase [Source:MGI Symbol;Acc:MGI:2387586]	-0.473948	0.325366	FALSE	opposite	-0.799314	0.799314
Smco3	single-pass membrane protein with coiled-coil domains 3 [Source:MGI Symbol;Acc:MGI:2443451]	-0.416637	0.37993	FALSE	opposite	-0.796567	0.796567
Map7	microtubule-associated protein 7 [Source:MGI Symbol;Acc:MGI:1328328]	-0.326192	0.470236	FALSE	opposite	-0.796428	0.796428
Spry4	sprouty homolog 4 (Drosophila) [Source:MGI Symbol;Acc:MGI:1345144]	0.404664	-0.390875	opposite	FALSE	0.79554	0.79554
Smyd1	SET and MYND domain containing 1 [Source:MGI Symbol;Acc:MGI:104790]	-0.262366	0.530366	FALSE	opposite	-0.792732	0.792732
Sspn	sarcospan [Source:MGI Symbol;Acc:MGI:1353511]	-0.257435	0.534122	FALSE	opposite	-0.791557	0.791557
Mal	myelin and lymphocyte protein, T cell differentiation protein [Source:MGI Symbol;Acc:MGI:892970]	-0.492359	0.298271	FALSE	opposite	-0.79063	0.79063
Thbs2	thrombospondin 2 [Source:MGI Symbol;Acc:MGI:98738]	0.351669	-0.438816	opposite	FALSE	0.790485	0.790485
Gdf11	growth differentiation factor 11 [Source:MGI Symbol;Acc:MGI:1338027]	0.383747	-0.405311	opposite	FALSE	0.789059	0.789059
Slc37a2	solute carrier family 37 (glycerol-3-phosphate transporter), member 2 [Source:MGI Symbol;Acc:MGI:1929693]	-0.340744	0.448314	FALSE	opposite	-0.789057	0.789057
Sel1l3	sel-1 suppressor of lin-12-like 3 (C. elegans) [Source:MGI Symbol;Acc:MGI:1916941]	0.423769	-0.364298	opposite	FALSE	0.788067	0.788067
Pde2a	phosphodiesterase 2A, cGMP-stimulated [Source:MGI Symbol;Acc:MGI:2446107]	-0.395709	0.389082	FALSE	opposite	-0.784791	0.784791
Ecm2	extracellular matrix protein 2, female organ and adipocyte specific [Source:MGI Symbol;Acc:MGI:3039578]	-0.352043	0.429058	FALSE	opposite	-0.781101	0.781101
Cdc42ep4	CDC42 effector protein (Rho GTPase binding) 4 [Source:MGI Symbol;Acc:MGI:1929760]	0.382178	-0.398683	opposite	FALSE	0.780862	0.780862
Cpt2	carnitine palmitoyltransferase 2 [Source:MGI Symbol;Acc:MGI:109176]	-0.511787	0.268661	FALSE	opposite	-0.780447	0.780447
Id2	inhibitor of DNA binding 2 [Source:MGI Symbol;Acc:MGI:96397]	0.30891	-0.47131	opposite	FALSE	0.78022	0.78022
Gm6166	predicted gene 6166 [Source:MGI Symbol;Acc:MGI:3645893]	0.294305	-0.480613	opposite	FALSE	0.774918	0.774918
Ndp	Norrie disease (pseudoglioma) (human) [Source:MGI Symbol;Acc:MGI:102570]	0.285426	-0.488988	opposite	FALSE	0.774414	0.774414
Efs	embryonal Fyn-associated substrate [Source:MGI Symbol;Acc:MGI:105311]	0.448881	-0.321928	opposite	FALSE	0.770809	0.770809
Gm973	predicted gene 973 [Source:MGI Symbol;Acc:MGI:2685819]	-0.272798	0.492914	FALSE	opposite	-0.765712	0.765712
Slc37a4	solute carrier family 37 (glucose-6-phosphate transporter), member 4 [Source:MGI Symbol;Acc:MGI:1316650]	-0.485727	0.279682	FALSE	opposite	-0.765409	0.765409
Pnpla3	patatin-like phospholipase domain containing 3 [Source:MGI Symbol;Acc:MGI:2151796]	0.219301	-0.545942	opposite	FALSE	0.765243	0.765243
Phf15	jade family PHD finger 2 [Source:MGI Symbol;Acc:MGI:1924151]	-0.335603	0.426727	FALSE	opposite	-0.76233	0.76233
Snx7	sorting nexin 7 [Source:MGI Symbol;Acc:MGI:1923811]	0.272909	-0.483968	opposite	FALSE	0.756877	0.756877
Sat2	spermidine/spermine N1-acetyl transferase 2 [Source:MGI Symbol;Acc:MGI:1916465]	-0.343768	0.411337	FALSE	opposite	-0.755105	0.755105
Lmo2	LIM domain only 2 [Source:MGI Symbol;Acc:MGI:102811]	0.364358	-0.38647	opposite	FALSE	0.750827	0.750827
Map10	microtubule-associated protein 10 [Source:MGI Symbol;Acc:MGI:1921643]	-0.284068	0.466753	FALSE	opposite	-0.750821	0.750821
Pck2	phosphoenolpyruvate carboxykinase 2 (mitochondrial) [Source:MGI Symbol;Acc:MGI:1860456]	-0.484536	0.265894	FALSE	opposite	-0.75043	0.75043
Arsg	arylsulfatase G [Source:MGI Symbol;Acc:MGI:1921258]	-0.448282	0.301656	FALSE	opposite	-0.749938	0.749938
Slc25a18	solute carrier family 25 (mitochondrial carrier), member 18 [Source:MGI Symbol;Acc:MGI:1919053]	0.243284	-0.506624	opposite	FALSE	0.749908	0.749908
Cd34	CD34 antigen [Source:MGI Symbol;Acc:MGI:88329]	0.43333	-0.316458	opposite	FALSE	0.749788	0.749788
Cyp51	cytochrome P450, family 51 [Source:MGI Symbol;Acc:MGI:106040]	0.232925	-0.515089	opposite	FALSE	0.748013	0.748013
Cables1	CDK5 and Abl enzyme substrate 1 [Source:MGI Symbol;Acc:MGI:1927065]	-0.470284	0.275853	FALSE	opposite	-0.746137	0.746137
Tmem164	transmembrane protein 164 [Source:MGI Symbol;Acc:MGI:2148020]	0.465328	-0.279625	opposite	FALSE	0.744953	0.744953
Slc5a7	solute carrier family 5 (choline transporter), member 7 [Source:MGI Symbol;Acc:MGI:1927126]	0.315597	-0.424885	opposite	FALSE	0.740482	0.740482
Dab2	disabled 2, mitogen-responsive phosphoprotein [Source:MGI Symbol;Acc:MGI:109175]	0.41847	-0.321928	opposite	FALSE	0.740398	0.740398
Fam213a	family with sequence similarity 213, member A [Source:MGI Symbol;Acc:MGI:1917814]	-0.400016	0.339287	FALSE	opposite	-0.739302	0.739302
Slc12a4	solute carrier family 12, member 4 [Source:MGI Symbol;Acc:MGI:1309465]	0.291185	-0.44792	opposite	FALSE	0.739105	0.739105
Wnt3	wingless-type MMTV integration site family, member 3 [Source:MGI Symbol;Acc:MGI:98955]	-0.40549	0.332029	FALSE	opposite	-0.737519	0.737519
Pex5l	peroxisomal biogenesis factor 5-like [Source:MGI Symbol;Acc:MGI:1916672]	-0.410212	0.327305	FALSE	opposite	-0.737517	0.737517
Fads1	fatty acid desaturase 1 [Source:MGI Symbol;Acc:MGI:1923517]	0.291792	-0.443695	opposite	FALSE	0.735487	0.735487
Mid1ip1	Mid1 interacting protein 1 (gastrulation specific G12-like (zebrafish)) [Source:MGI Symbol;Acc:MGI:1915291]	0.200936	-0.531777	opposite	FALSE	0.732713	0.732713
Trib2	tribbles homolog 2 (Drosophila) [Source:MGI Symbol;Acc:MGI:2145021]	0.466182	-0.258847	opposite	FALSE	0.725029	0.725029
Sparc	secreted acidic cysteine rich glycoprotein [Source:MGI Symbol;Acc:MGI:98373]	-0.430718	0.293946	FALSE	opposite	-0.724664	0.724664
Mtmr2	myotubularin related protein 2 [Source:MGI Symbol;Acc:MGI:1924366]	-0.299199	0.421759	FALSE	opposite	-0.720958	0.720958
C1ql1	complement component 1, q subcomponent-like 1 [Source:MGI Symbol;Acc:MGI:1344400]	0.253249	-0.459147	opposite	FALSE	0.712396	0.712396
Eml1	echinoderm microtubule associated protein like 1 [Source:MGI Symbol;Acc:MGI:1915769]	0.32935	-0.382836	opposite	FALSE	0.712187	0.712187
Lrrc1	leucine rich repeat containing 1 [Source:MGI Symbol;Acc:MGI:2442313]	-0.430308	0.2814	FALSE	opposite	-0.711708	0.711708
Aff1	AF4/FMR2 family, member 1 [Source:MGI Symbol;Acc:MGI:1100819]	-0.266479	0.444763	FALSE	opposite	-0.711242	0.711242
Zmat1	zinc finger, matrin type 1 [Source:MGI Symbol;Acc:MGI:2442284]	-0.367301	0.340833	FALSE	opposite	-0.708134	0.708134
Sox13	SRY (sex determining region Y)-box 13 [Source:MGI Symbol;Acc:MGI:98361]	0.371176	-0.331619	opposite	FALSE	0.702795	0.702795
Ak3	adenylate kinase 3 [Source:MGI Symbol;Acc:MGI:1860835]	-0.376256	0.326034	FALSE	opposite	-0.70229	0.70229
Gstt1	glutathione S-transferase, theta 1 [Source:MGI Symbol;Acc:MGI:107379]	-0.357974	0.341678	FALSE	opposite	-0.699651	0.699651
Ivd	isovaleryl coenzyme A dehydrogenase [Source:MGI Symbol;Acc:MGI:1929242]	-0.358373	0.340497	FALSE	opposite	-0.698869	0.698869
Fkbp10	FK506 binding protein 10 [Source:MGI Symbol;Acc:MGI:104769]	0.316474	-0.378314	opposite	FALSE	0.694788	0.694788
B3gnt9	UDP-GlcNAc:betaGal beta-1,3-N-acetylglucosaminyltransferase 9 [Source:MGI Symbol;Acc:MGI:2142841]	-0.265447	0.42849	FALSE	opposite	-0.693938	0.693938
Gpt2	glutamic pyruvate transaminase (alanine aminotransferase) 2 [Source:MGI Symbol;Acc:MGI:1915391]	-0.264246	0.429517	FALSE	opposite	-0.693763	0.693763
Tlcd1	TLC domain containing 1 [Source:MGI Symbol;Acc:MGI:1915572]	0.158032	-0.535046	opposite	FALSE	0.693078	0.693078
Rapgef3	Rap guanine nucleotide exchange factor (GEF) 3 [Source:MGI Symbol;Acc:MGI:2441741]	-0.339106	0.351003	FALSE	opposite	-0.69011	0.69011
Phf13	PHD finger protein 13 [Source:MGI Symbol;Acc:MGI:2446217]	0.252674	-0.435919	opposite	FALSE	0.688593	0.688593
Npl	N-acetylneuraminate pyruvate lyase [Source:MGI Symbol;Acc:MGI:1921341]	0.296326	-0.389682	opposite	FALSE	0.686008	0.686008
Lxn	latexin [Source:MGI Symbol;Acc:MGI:107633]	0.284977	-0.400762	opposite	FALSE	0.685739	0.685739
Amz1	archaelysin family metallopeptidase 1 [Source:MGI Symbol;Acc:MGI:2442258]	0.275209	-0.41045	opposite	FALSE	0.685659	0.685659
Osbpl3	oxysterol binding protein-like 3 [Source:MGI Symbol;Acc:MGI:1918970]	0.305107	-0.379493	opposite	FALSE	0.684601	0.684601
Eltd1	EGF, latrophilin seven transmembrane domain containing 1 [Source:MGI Symbol;Acc:MGI:2655562]	-0.262721	0.417674	FALSE	opposite	-0.680395	0.680395
Tfrc	transferrin receptor [Source:MGI Symbol;Acc:MGI:98822]	0.315983	-0.363141	opposite	FALSE	0.679124	0.679124
Boc	biregional cell adhesion molecule-related/down-regulated by oncogenes (Cdon) binding protein [Source:MGI Symbol;Acc:MGI:2151153]	-0.286527	0.391386	FALSE	opposite	-0.677913	0.677913
Kpna2	karyopherin (importin) alpha 2 [Source:MGI Symbol;Acc:MGI:103561]	0.268986	-0.408524	opposite	FALSE	0.67751	0.67751
Efnb3	ephrin B3 [Source:MGI Symbol;Acc:MGI:109196]	-0.358106	0.3186	FALSE	opposite	-0.676706	0.676706
Srsf9	serine/arginine-rich splicing factor 9 [Source:MGI Symbol;Acc:MGI:104896]	0.255027	-0.416722	opposite	FALSE	0.671749	0.671749
Hopx	HOP homeobox [Source:MGI Symbol;Acc:MGI:1916782]	0.248575	-0.413705	opposite	FALSE	0.66228	0.66228
Megf11	multiple EGF-like-domains 11 [Source:MGI Symbol;Acc:MGI:1920951]	0.311542	-0.349347	opposite	FALSE	0.66089	0.66089
Cpt1c	carnitine palmitoyltransferase 1c [Source:MGI Symbol;Acc:MGI:2446526]	-0.278046	0.382431	FALSE	opposite	-0.660477	0.660477
Stx2	syntaxin 2 [Source:MGI Symbol;Acc:MGI:108059]	0.285277	-0.37301	opposite	FALSE	0.658288	0.658288
Pigz	phosphatidylinositol glycan anchor biosynthesis, class Z [Source:MGI Symbol;Acc:MGI:2443822]	-0.340761	0.317241	FALSE	opposite	-0.658002	0.658002
Vps37b	vacuolar protein sorting 37B (yeast) [Source:MGI Symbol;Acc:MGI:1916724]	0.254272	-0.402958	opposite	FALSE	0.65723	0.65723
Ngef	neuronal guanine nucleotide exchange factor [Source:MGI Symbol;Acc:MGI:1858414]	0.324597	-0.327829	opposite	FALSE	0.652426	0.652426
Wnt7b	wingless-type MMTV integration site family, member 7B [Source:MGI Symbol;Acc:MGI:98962]	0.320944	-0.327063	opposite	FALSE	0.648008	0.648008
Pld2	phospholipase D2 [Source:MGI Symbol;Acc:MGI:892877]	0.367258	-0.280359	opposite	FALSE	0.647617	0.647617
Kctd3	potassium channel tetramerisation domain containing 3 [Source:MGI Symbol;Acc:MGI:2444629]	-0.377064	0.270471	FALSE	opposite	-0.647535	0.647535
Wbscr27	Williams Beuren syndrome chromosome region 27 (human) [Source:MGI Symbol;Acc:MGI:1933146]	-0.261333	0.385739	FALSE	opposite	-0.647072	0.647072
Fmnl3	formin-like 3 [Source:MGI Symbol;Acc:MGI:109569]	0.329766	-0.317121	opposite	FALSE	0.646887	0.646887
Itfg3	integrin alpha FG-GAP repeat containing 3 [Source:MGI Symbol;Acc:MGI:2146854]	-0.407583	0.237974	FALSE	opposite	-0.645557	0.645557
Nid1	nidogen 1 [Source:MGI Symbol;Acc:MGI:97342]	0.30478	-0.339101	opposite	FALSE	0.643881	0.643881
Msi1	musashi RNA-binding protein 1 [Source:MGI Symbol;Acc:MGI:107376]	0.389947	-0.252432	opposite	FALSE	0.642379	0.642379
Arsk	arylsulfatase K [Source:MGI Symbol;Acc:MGI:1924291]	-0.298587	0.343332	FALSE	opposite	-0.641919	0.641919
Pik3r1	phosphatidylinositol 3-kinase, regulatory subunit, polypeptide 1 (p85 alpha) [Source:MGI Symbol;Acc:MGI:97583]	-0.24173	0.399409	FALSE	opposite	-0.641139	0.641139
Mmp15	matrix metallopeptidase 15 [Source:MGI Symbol;Acc:MGI:109320]	0.239709	-0.400312	opposite	FALSE	0.640021	0.640021
Adi1	acireductone dioxygenase 1 [Source:MGI Symbol;Acc:MGI:2144929]	-0.412069	0.226108	FALSE	opposite	-0.638177	0.638177
Ptpdc1	protein tyrosine phosphatase domain containing 1 [Source:MGI Symbol;Acc:MGI:2145430]	-0.358451	0.273066	FALSE	opposite	-0.631517	0.631517
Crabp1	cellular retinoic acid binding protein I [Source:MGI Symbol;Acc:MGI:88490]	0.278167	-0.353102	opposite	FALSE	0.631268	0.631268
Adra1b	adrenergic receptor, alpha 1b [Source:MGI Symbol;Acc:MGI:104774]	0.27287	-0.356767	opposite	FALSE	0.629637	0.629637
Sh3pxd2a	SH3 and PX domains 2A [Source:MGI Symbol;Acc:MGI:1298393]	0.30236	-0.327183	opposite	FALSE	0.629542	0.629542
Hapln2	hyaluronan and proteoglycan link protein 2 [Source:MGI Symbol;Acc:MGI:2137300]	-0.288729	0.337788	FALSE	opposite	-0.626517	0.626517
Prr18	proline rich 18 [Source:MGI Symbol;Acc:MGI:2443403]	-0.246203	0.375716	FALSE	opposite	-0.621919	0.621919
Aldh1l1	aldehyde dehydrogenase 1 family, member L1 [Source:MGI Symbol;Acc:MGI:1340024]	-0.385356	0.234958	FALSE	opposite	-0.620314	0.620314
Tubb2b	tubulin, beta 2B class IIB [Source:MGI Symbol;Acc:MGI:1920960]	0.281795	-0.337722	opposite	FALSE	0.619517	0.619517
Mterfd3	mitochondrial transcription termination factor 2 [Source:MGI Symbol;Acc:MGI:1921488]	-0.352573	0.266504	FALSE	opposite	-0.619077	0.619077
Nrbp2	nuclear receptor binding protein 2 [Source:MGI Symbol;Acc:MGI:2385017]	-0.282697	0.33618	FALSE	opposite	-0.618877	0.618877
Ccnyl1	cyclin Y-like 1 [Source:MGI Symbol;Acc:MGI:2138614]	0.337779	-0.279186	opposite	FALSE	0.616965	0.616965
Aqp11	aquaporin 11 [Source:MGI Symbol;Acc:MGI:1913583]	-0.257541	0.354688	FALSE	opposite	-0.612229	0.612229
Zfp692	zinc finger protein 692 [Source:MGI Symbol;Acc:MGI:2144276]	-0.250265	0.361795	FALSE	opposite	-0.612061	0.612061
Nr2f1	nuclear receptor subfamily 2, group F, member 1 [Source:MGI Symbol;Acc:MGI:1352451]	0.342638	-0.269054	opposite	FALSE	0.611692	0.611692
Adam15	a disintegrin and metallopeptidase domain 15 (metargidin) [Source:MGI Symbol;Acc:MGI:1333882]	-0.348405	0.261848	FALSE	opposite	-0.610253	0.610253
Cryz	crystallin, zeta [Source:MGI Symbol;Acc:MGI:88527]	-0.1892	0.420296	FALSE	opposite	-0.609496	0.609496
Cntfr	ciliary neurotrophic factor receptor [Source:MGI Symbol;Acc:MGI:99605]	-0.34219	0.262215	FALSE	opposite	-0.604405	0.604405
Ccdc117	coiled-coil domain containing 117 [Source:MGI Symbol;Acc:MGI:2144383]	0.2458	-0.355443	opposite	FALSE	0.601242	0.601242
Ap5z1	adaptor-related protein complex 5, zeta 1 subunit [Source:MGI Symbol;Acc:MGI:1924908]	-0.356018	0.243354	FALSE	opposite	-0.599373	0.599373
Zfp839	zinc finger protein 839 [Source:MGI Symbol;Acc:MGI:1920055]	-0.253527	0.344547	FALSE	opposite	-0.598074	0.598074
Pvrl3	poliovirus receptor-related 3 [Source:MGI Symbol;Acc:MGI:1930171]	0.326633	-0.270157	opposite	FALSE	0.596791	0.596791
Ptbp1	polypyrimidine tract binding protein 1 [Source:MGI Symbol;Acc:MGI:97791]	0.35756	-0.235978	opposite	FALSE	0.593538	0.593538
Nrep	neuronal regeneration related protein [Source:MGI Symbol;Acc:MGI:99444]	0.340154	-0.252826	opposite	FALSE	0.592979	0.592979
Ccdc41os1	centrosomal protein 83, opposite strand [Source:MGI Symbol;Acc:MGI:1914973]	-0.249051	0.343428	FALSE	opposite	-0.592479	0.592479
Rab31	RAB31, member RAS oncogene family [Source:MGI Symbol;Acc:MGI:1914603]	-0.284924	0.307421	FALSE	opposite	-0.592345	0.592345
Rgs19	regulator of G-protein signaling 19 [Source:MGI Symbol;Acc:MGI:1915153]	0.25319	-0.335103	opposite	FALSE	0.588294	0.588294
Acsbg1	acyl-CoA synthetase bubblegum family member 1 [Source:MGI Symbol;Acc:MGI:2385656]	-0.267341	0.319992	FALSE	opposite	-0.587333	0.587333
Plcb1	phospholipase C, beta 1 [Source:MGI Symbol;Acc:MGI:97613]	-0.206383	0.378653	FALSE	opposite	-0.585036	0.585036
Spon1	spondin 1, (f-spondin) extracellular matrix protein [Source:MGI Symbol;Acc:MGI:2385287]	-0.20698	0.372442	FALSE	opposite	-0.579422	0.579422
Elmo2	engulfment and cell motility 2 [Source:MGI Symbol;Acc:MGI:2153045]	0.364029	-0.215062	opposite	FALSE	0.579091	0.579091
Megf9	multiple EGF-like-domains 9 [Source:MGI Symbol;Acc:MGI:1918264]	-0.283023	0.295217	FALSE	opposite	-0.578241	0.578241
Stxbp3a	syntaxin binding protein 3A [Source:MGI Symbol;Acc:MGI:107362]	-0.243675	0.333915	FALSE	opposite	-0.57759	0.57759
Swap70	SWA-70 protein [Source:MGI Symbol;Acc:MGI:1298390]	0.249607	-0.326621	opposite	FALSE	0.576228	0.576228
Aldoc	aldolase C, fructose-bisphosphate [Source:MGI Symbol;Acc:MGI:101863]	-0.349923	0.224319	FALSE	opposite	-0.574242	0.574242
Cdc25a	cell division cycle 25A [Source:MGI Symbol;Acc:MGI:103198]	0.245589	-0.327262	opposite	FALSE	0.572851	0.572851
Foxo3	forkhead box O3 [Source:MGI Symbol;Acc:MGI:1890081]	-0.283153	0.282865	FALSE	opposite	-0.566018	0.566018
Hsdl2	hydroxysteroid dehydrogenase like 2 [Source:MGI Symbol;Acc:MGI:1919729]	-0.194065	0.370324	FALSE	opposite	-0.56439	0.56439
Hmgcr	3-hydroxy-3-methylglutaryl-Coenzyme A reductase [Source:MGI Symbol;Acc:MGI:96159]	0.33738	-0.225028	opposite	FALSE	0.562408	0.562408
Vgf	VGF nerve growth factor inducible [Source:MGI Symbol;Acc:MGI:1343180]	0.24745	-0.31035	opposite	FALSE	0.5578	0.5578
Clmp	CXADR-like membrane protein [Source:MGI Symbol;Acc:MGI:1918816]	0.233594	-0.324133	opposite	FALSE	0.557727	0.557727
Col9a3	collagen, type IX, alpha 3 [Source:MGI Symbol;Acc:MGI:894686]	0.197147	-0.359222	opposite	FALSE	0.556369	0.556369
Lpcat1	lysophosphatidylcholine acyltransferase 1 [Source:MGI Symbol;Acc:MGI:2384812]	0.2395	-0.316631	opposite	FALSE	0.556131	0.556131
Decr1	2,4-dienoyl CoA reductase 1, mitochondrial [Source:MGI Symbol;Acc:MGI:1914710]	-0.301579	0.254262	FALSE	opposite	-0.555841	0.555841
Slc39a11	solute carrier family 39 (metal ion transporter), member 11 [Source:MGI Symbol;Acc:MGI:1917056]	0.255614	-0.298708	opposite	FALSE	0.554322	0.554322
Zfp276	zinc finger protein (C2H2 type) 276 [Source:MGI Symbol;Acc:MGI:1888495]	-0.272174	0.281856	FALSE	opposite	-0.55403	0.55403
Serpina3n	serine (or cysteine) peptidase inhibitor, clade A, member 3N [Source:MGI Symbol;Acc:MGI:105045]	-0.245749	0.307612	FALSE	opposite	-0.553361	0.553361
Bahd1	bromo adjacent homology domain containing 1 [Source:MGI Symbol;Acc:MGI:2139371]	0.277104	-0.275848	opposite	FALSE	0.552952	0.552952
Dnm2	dynamin 2 [Source:MGI Symbol;Acc:MGI:109547]	-0.216596	0.327547	FALSE	opposite	-0.544143	0.544143
Daam2	dishevelled associated activator of morphogenesis 2 [Source:MGI Symbol;Acc:MGI:1923691]	-0.202431	0.339854	FALSE	opposite	-0.542286	0.542286
Tmod1	tropomodulin 1 [Source:MGI Symbol;Acc:MGI:98775]	-0.244727	0.295347	FALSE	opposite	-0.540075	0.540075
Rasal1	RAS protein activator like 1 (GAP1 like) [Source:MGI Symbol;Acc:MGI:1330842]	-0.234541	0.303499	FALSE	opposite	-0.53804	0.53804
Darc	atypical chemokine receptor 1 (Duffy blood group) [Source:MGI Symbol;Acc:MGI:1097689]	0.178563	-0.358454	opposite	FALSE	0.537017	0.537017
Kctd15	potassium channel tetramerisation domain containing 15 [Source:MGI Symbol;Acc:MGI:2385276]	0.260775	-0.275298	opposite	FALSE	0.536073	0.536073
Maged2	melanoma antigen, family D, 2 [Source:MGI Symbol;Acc:MGI:1933391]	0.209717	-0.325142	opposite	FALSE	0.534859	0.534859
Calr	calreticulin [Source:MGI Symbol;Acc:MGI:88252]	0.168286	-0.364229	opposite	FALSE	0.532515	0.532515
Zhx3	zinc fingers and homeoboxes 3 [Source:MGI Symbol;Acc:MGI:2444772]	-0.212772	0.317578	FALSE	opposite	-0.530351	0.530351
Ralb	v-ral simian leukemia viral oncogene homolog B (ras related) [Source:MGI Symbol;Acc:MGI:1927244]	0.180475	-0.349477	opposite	FALSE	0.529952	0.529952
1110032A03Rik	RIKEN cDNA 1110032A03 gene [Source:MGI Symbol;Acc:MGI:1915971]	-0.282087	0.247507	FALSE	opposite	-0.529594	0.529594
Maob	monoamine oxidase B [Source:MGI Symbol;Acc:MGI:96916]	-0.213973	0.315232	FALSE	opposite	-0.529205	0.529205
Prkag2	protein kinase, AMP-activated, gamma 2 non-catalytic subunit [Source:MGI Symbol;Acc:MGI:1336153]	0.219705	-0.303819	opposite	FALSE	0.523524	0.523524
Edil3	EGF-like repeats and discoidin I-like domains 3 [Source:MGI Symbol;Acc:MGI:1329025]	-0.189163	0.333219	FALSE	opposite	-0.522383	0.522383
Kifc3	kinesin family member C3 [Source:MGI Symbol;Acc:MGI:109202]	0.282952	-0.238372	opposite	FALSE	0.521323	0.521323
Lrig1	leucine-rich repeats and immunoglobulin-like domains 1 [Source:MGI Symbol;Acc:MGI:107935]	0.267538	-0.25117	opposite	FALSE	0.518708	0.518708
Nfe2l2	nuclear factor, erythroid derived 2, like 2 [Source:MGI Symbol;Acc:MGI:108420]	-0.258153	0.260342	FALSE	opposite	-0.518496	0.518496
Wls	wntless homolog (Drosophila) [Source:MGI Symbol;Acc:MGI:1915401]	0.242247	-0.275569	opposite	FALSE	0.517816	0.517816
Rnf103	ring finger protein 103 [Source:MGI Symbol;Acc:MGI:109483]	-0.303479	0.210042	FALSE	opposite	-0.513521	0.513521
mt-Nd1	mitochondrially encoded NADH dehydrogenase 1 [Source:MGI Symbol;Acc:MGI:101787]	-0.217795	0.295373	FALSE	opposite	-0.513168	0.513168
Tmem64	transmembrane protein 64 [Source:MGI Symbol;Acc:MGI:2140359]	0.22175	-0.290599	opposite	FALSE	0.512349	0.512349
Slc5a3	solute carrier family 5 (inositol transporters), member 3 [Source:MGI Symbol;Acc:MGI:1858226]	0.213448	-0.295737	opposite	FALSE	0.509185	0.509185
Hey1	hairy/enhancer-of-split related with YRPW motif 1 [Source:MGI Symbol;Acc:MGI:1341800]	0.275804	-0.233292	opposite	FALSE	0.509096	0.509096
Oplah	5-oxoprolinase (ATP-hydrolysing) [Source:MGI Symbol;Acc:MGI:1922725]	-0.230368	0.277851	FALSE	opposite	-0.508219	0.508219
Ephb1	Eph receptor B1 [Source:MGI Symbol;Acc:MGI:1096337]	0.211906	-0.295493	opposite	FALSE	0.507399	0.507399
Ttc30b	tetratricopeptide repeat domain 30B [Source:MGI Symbol;Acc:MGI:1919671]	-0.166996	0.339108	FALSE	opposite	-0.506104	0.506104
Ezh1	enhancer of zeste homolog 1 (Drosophila) [Source:MGI Symbol;Acc:MGI:1097695]	-0.290356	0.212858	FALSE	opposite	-0.503214	0.503214
Mras	muscle and microspikes RAS [Source:MGI Symbol;Acc:MGI:1100856]	0.246817	-0.255348	opposite	FALSE	0.502165	0.502165
Plekhg3	pleckstrin homology domain containing, family G (with RhoGef domain) member 3 [Source:MGI Symbol;Acc:MGI:2388284]	-0.25214	0.249352	FALSE	opposite	-0.501491	0.501491
Lrrc42	leucine rich repeat containing 42 [Source:MGI Symbol;Acc:MGI:1925059]	0.180214	-0.320762	opposite	FALSE	0.500976	0.500976
2015-03-09	membrane-associated ring finger (C3HC4) 9 [Source:MGI Symbol;Acc:MGI:2446144]	0.206483	-0.291215	opposite	FALSE	0.497697	0.497697
Plekhh1	pleckstrin homology domain containing, family H (with MyTH4 domain) member 1 [Source:MGI Symbol;Acc:MGI:2144989]	-0.202473	0.29455	FALSE	opposite	-0.497023	0.497023
Slc12a2	solute carrier family 12, member 2 [Source:MGI Symbol;Acc:MGI:101924]	-0.177166	0.319107	FALSE	opposite	-0.496274	0.496274
Emc8	ER membrane protein complex subunit 8 [Source:MGI Symbol;Acc:MGI:1343095]	-0.232955	0.263192	FALSE	opposite	-0.496147	0.496147
Cmtm6	CKLF-like MARVEL transmembrane domain containing 6 [Source:MGI Symbol;Acc:MGI:2447165]	0.240146	-0.255987	opposite	FALSE	0.496133	0.496133
Tprkb	Tp53rk binding protein [Source:MGI Symbol;Acc:MGI:1917036]	-0.196902	0.296686	FALSE	opposite	-0.493589	0.493589
Slc22a4	solute carrier family 22 (organic cation transporter), member 4 [Source:MGI Symbol;Acc:MGI:1353479]	-0.263759	0.22037	FALSE	opposite	-0.484129	0.484129
mt-Nd4	mitochondrially encoded NADH dehydrogenase 4 [Source:MGI Symbol;Acc:MGI:102498]	-0.188499	0.292891	FALSE	opposite	-0.48139	0.48139
Pdxk	pyridoxal (pyridoxine, vitamin B6) kinase [Source:MGI Symbol;Acc:MGI:1351869]	-0.238884	0.24096	FALSE	opposite	-0.479844	0.479844
Fam101b	family with sequence similarity 101, member B [Source:MGI Symbol;Acc:MGI:1923816]	0.187286	-0.288164	opposite	FALSE	0.47545	0.47545
Cspg5	chondroitin sulfate proteoglycan 5 [Source:MGI Symbol;Acc:MGI:1352747]	0.134756	-0.334736	opposite	FALSE	0.469493	0.469493
Rnf13	ring finger protein 13 [Source:MGI Symbol;Acc:MGI:1346341]	-0.226443	0.240216	FALSE	opposite	-0.466659	0.466659
Gpr56	G protein-coupled receptor 56 [Source:MGI Symbol;Acc:MGI:1340051]	0.234964	-0.230793	opposite	FALSE	0.465757	0.465757
Inpp5k	inositol polyphosphate 5-phosphatase K [Source:MGI Symbol;Acc:MGI:1194899]	-0.24342	0.220681	FALSE	opposite	-0.464101	0.464101
Fam84a	family with sequence similarity 84, member A [Source:MGI Symbol;Acc:MGI:2145011]	0.253101	-0.208622	opposite	FALSE	0.461723	0.461723
Slc7a10	solute carrier family 7 (cationic amino acid transporter, y+ system), member 10 [Source:MGI Symbol;Acc:MGI:1858261]	0.179882	-0.280365	opposite	FALSE	0.460247	0.460247
Fam13a	family with sequence similarity 13, member A [Source:MGI Symbol;Acc:MGI:1889842]	-0.190668	0.267015	FALSE	opposite	-0.457683	0.457683
Ranbp9	RAN binding protein 9 [Source:MGI Symbol;Acc:MGI:1928741]	-0.240007	0.215805	FALSE	opposite	-0.455812	0.455812
Crebrf	CREB3 regulatory factor [Source:MGI Symbol;Acc:MGI:1924378]	-0.166109	0.287865	FALSE	opposite	-0.453973	0.453973
Phldb1	pleckstrin homology-like domain, family B, member 1 [Source:MGI Symbol;Acc:MGI:2143230]	-0.187487	0.262233	FALSE	opposite	-0.44972	0.44972
Abhd4	abhydrolase domain containing 4 [Source:MGI Symbol;Acc:MGI:1915938]	-0.148178	0.291251	FALSE	opposite	-0.439429	0.439429
Ttl	tubulin tyrosine ligase [Source:MGI Symbol;Acc:MGI:1916987]	0.154029	-0.284505	opposite	FALSE	0.438534	0.438534
Gramd3	GRAM domain containing 3 [Source:MGI Symbol;Acc:MGI:1914815]	0.14223	-0.290196	opposite	FALSE	0.432426	0.432426
Zdhhc2	zinc finger, DHHC domain containing 2 [Source:MGI Symbol;Acc:MGI:1923452]	0.212346	-0.219371	opposite	FALSE	0.431716	0.431716
Cpe	carboxypeptidase E [Source:MGI Symbol;Acc:MGI:101932]	-0.245557	0.18557	FALSE	opposite	-0.431128	0.431128
Ckap4	cytoskeleton-associated protein 4 [Source:MGI Symbol;Acc:MGI:2444926]	0.145415	-0.284421	opposite	FALSE	0.429835	0.429835
Vstm2b	V-set and transmembrane domain containing 2B [Source:MGI Symbol;Acc:MGI:1914525]	0.168118	-0.259431	opposite	FALSE	0.427549	0.427549
Ino80c	INO80 complex subunit C [Source:MGI Symbol;Acc:MGI:2443014]	-0.186867	0.237847	FALSE	opposite	-0.424715	0.424715
Dctn4	dynactin 4 [Source:MGI Symbol;Acc:MGI:1914915]	-0.165171	0.256026	FALSE	opposite	-0.421197	0.421197
Rbm43	RNA binding motif protein 43 [Source:MGI Symbol;Acc:MGI:1918934]	-0.179657	0.239124	FALSE	opposite	-0.41878	0.41878
Atp1a2	ATPase, Na+/K+ transporting, alpha 2 polypeptide [Source:MGI Symbol;Acc:MGI:88106]	0.156327	-0.251128	opposite	FALSE	0.407455	0.407455
Rrbp1	ribosome binding protein 1 [Source:MGI Symbol;Acc:MGI:1932395]	0.152243	-0.253168	opposite	FALSE	0.405411	0.405411
Numa1	nuclear mitotic apparatus protein 1 [Source:MGI Symbol;Acc:MGI:2443665]	-0.160697	0.235636	FALSE	opposite	-0.396333	0.396333
0610007P14Rik	RIKEN cDNA 0610007P14 gene [Source:MGI Symbol;Acc:MGI:1915571]	0.144928	-0.250881	opposite	FALSE	0.39581	0.39581
Rhobtb2	Rho-related BTB domain containing 2 [Source:MGI Symbol;Acc:MGI:2180557]	0.141818	-0.249976	opposite	FALSE	0.391793	0.391793
Acadsb	acyl-Coenzyme A dehydrogenase, short/branched chain [Source:MGI Symbol;Acc:MGI:1914135]	-0.134839	0.256755	FALSE	opposite	-0.391595	0.391595
Atp1b2	ATPase, Na+/K+ transporting, beta 2 polypeptide [Source:MGI Symbol;Acc:MGI:88109]	0.162393	-0.22787	opposite	FALSE	0.390263	0.390263
Chtf8	CTF8, chromosome transmission fidelity factor 8 [Source:MGI Symbol;Acc:MGI:2443370]	0.155674	-0.231749	opposite	FALSE	0.387423	0.387423
Tspyl2	TSPY-like 2 [Source:MGI Symbol;Acc:MGI:106244]	-0.175514	0.205097	FALSE	opposite	-0.380611	0.380611
Fscn1	fascin homolog 1, actin bundling protein (Strongylocentrotus purpuratus) [Source:MGI Symbol;Acc:MGI:1352745]	0.146804	-0.230296	opposite	FALSE	0.377101	0.377101
Nfia	nuclear factor I/A [Source:MGI Symbol;Acc:MGI:108056]	0.145766	-0.22702	opposite	FALSE	0.372786	0.372786
Glud1	glutamate dehydrogenase 1 [Source:MGI Symbol;Acc:MGI:95753]	0.142804	-0.229724	opposite	FALSE	0.372529	0.372529
Bcap29	B cell receptor associated protein 29 [Source:MGI Symbol;Acc:MGI:101917]	-0.140642	0.223639	FALSE	opposite	-0.364281	0.364281
Arhgef10l	Rho guanine nucleotide exchange factor (GEF) 10-like [Source:MGI Symbol;Acc:MGI:1920004]	0.155152	-0.203092	opposite	FALSE	0.358244	0.358244
Hnrnpab	heterogeneous nuclear ribonucleoprotein A/B [Source:MGI Symbol;Acc:MGI:1330294]	0.150217	-0.192148	opposite	FALSE	0.342365	0.342365
Gba	glucosidase, beta, acid [Source:MGI Symbol;Acc:MGI:95665]	0.137303	-0.200904	opposite	FALSE	0.338206	0.338206
